# Supplementary material for: Landscape and variation of novel retroduplications in 26 human populations
Source: PubMed Central journal article supplement (PMC5510864; doi:10.1371/journal.pcbi.1005567), 2017-06-29
Supplement: pcbi.1005567.s001.pdf [file pcbi.1005567.s001.pdf]

a)

Sort individuals in CEU based on unique parent gene counts

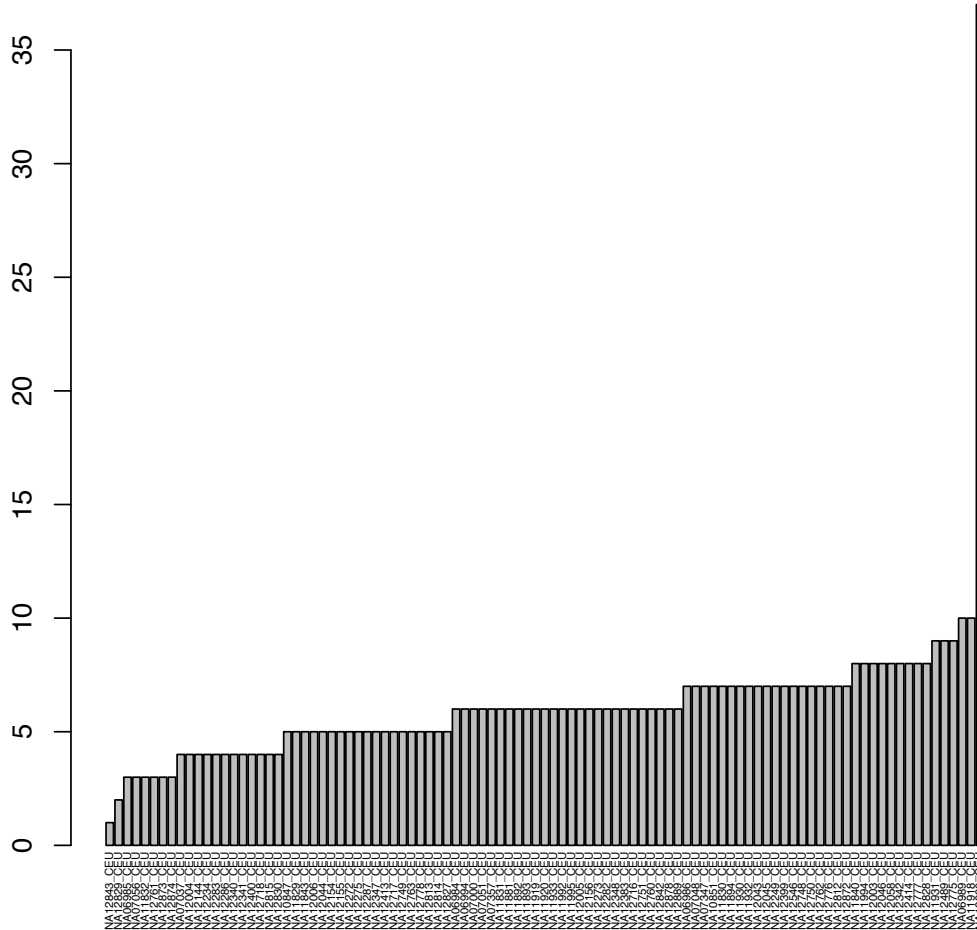

b)

Cumulative count plot of individuals in CEU

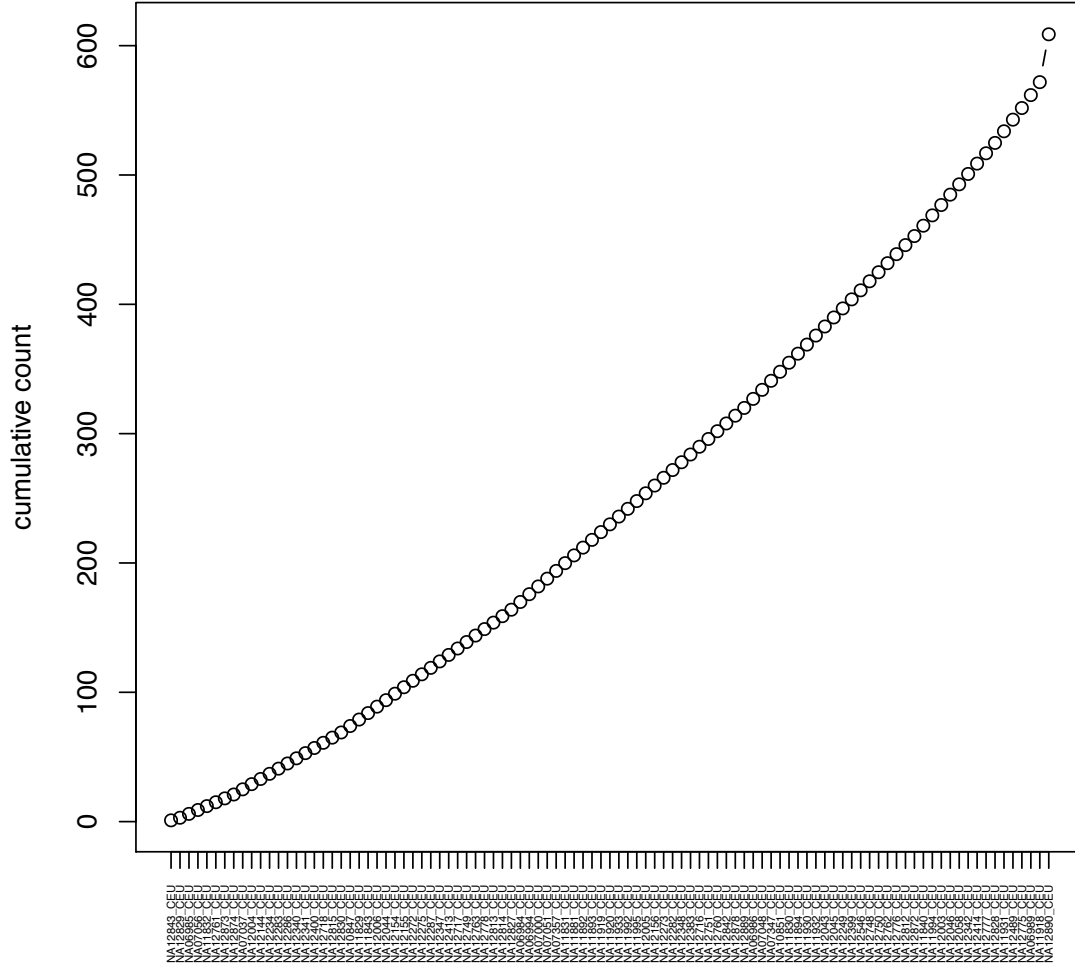

c)

Sort individuals in LWK based on unique parent gene counts

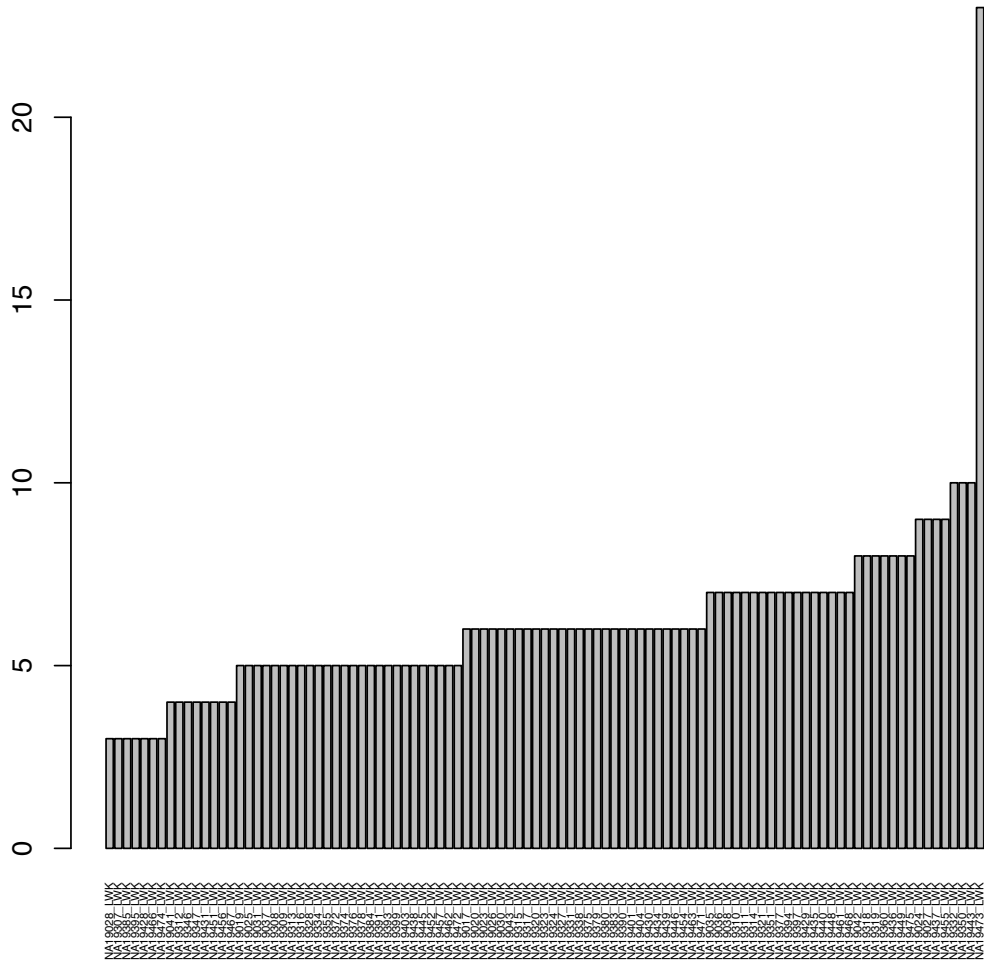

d)

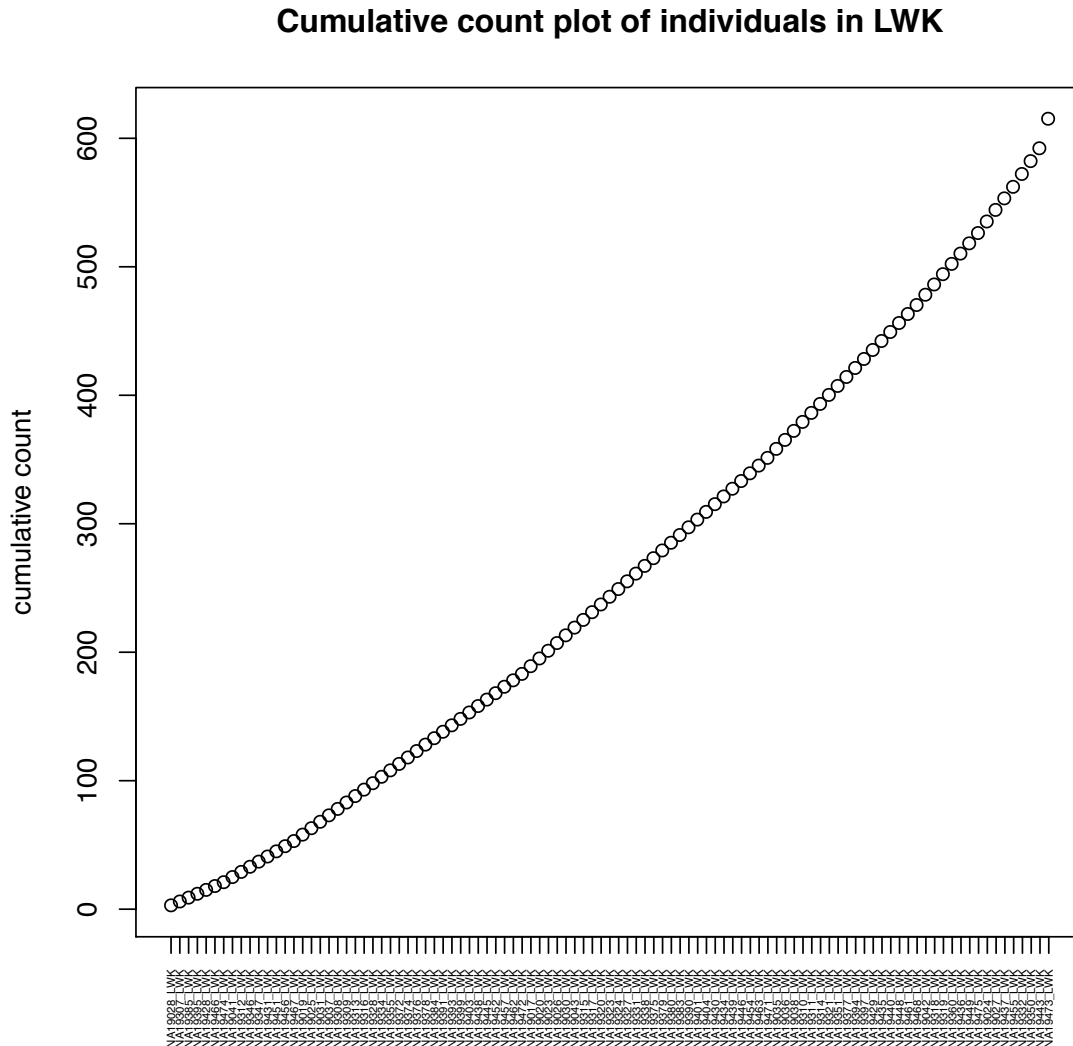

**Fig A. Diagnosis plots for detection of outlier individuals that have exceptionally high number of retroduplication calls.** In each population, we sort the individuals based on the number of unique parent genes having novel retroduplications. We have detected two individuals with exceptionally high number of retroduplication calls: NA12890 in CEU, and NA19473 in LWK. Diagnosis plots of CEU (panel a, b) and LWK (panel c, d) are shown here. Individuals in each population are sorted by increasing number of retroduplication calls.

a)

**Histogram of novel retroduplication calls per person**

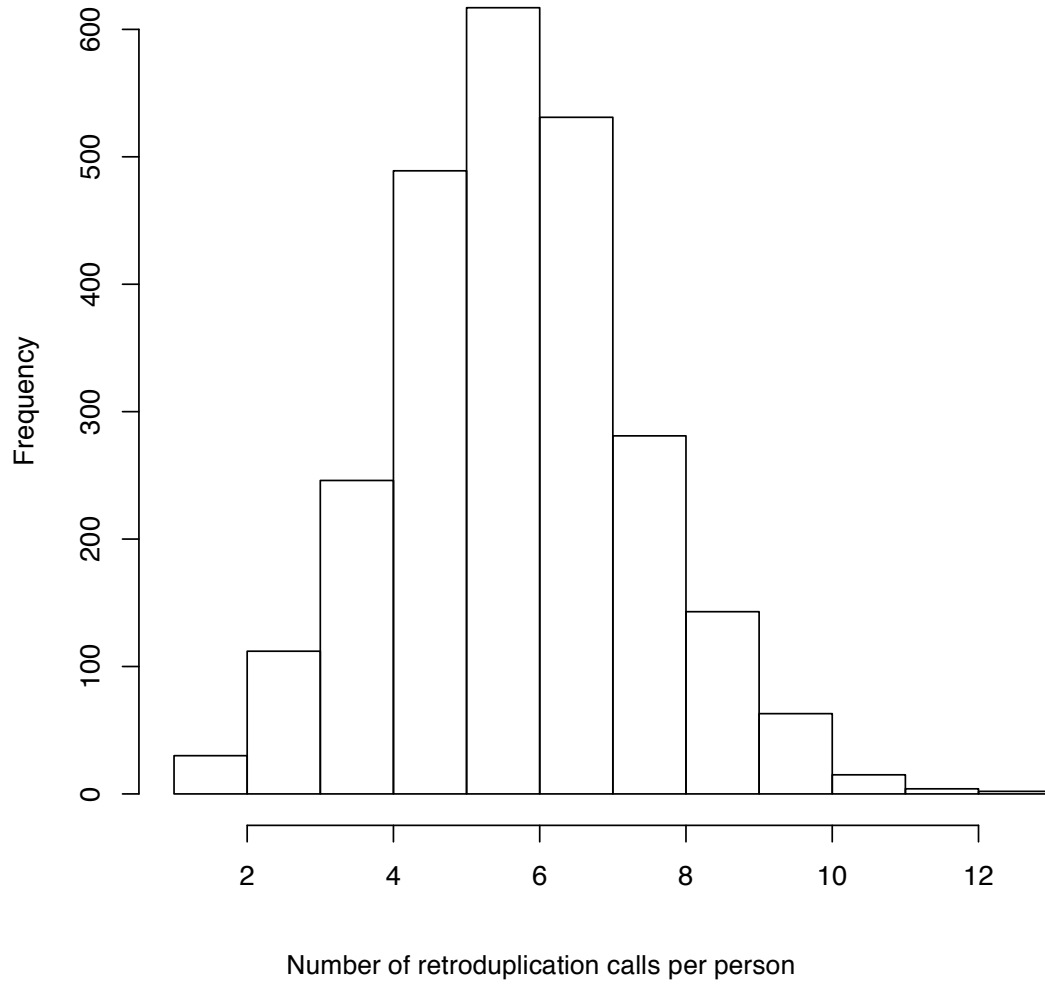

b)

### Distribution of common parent genes

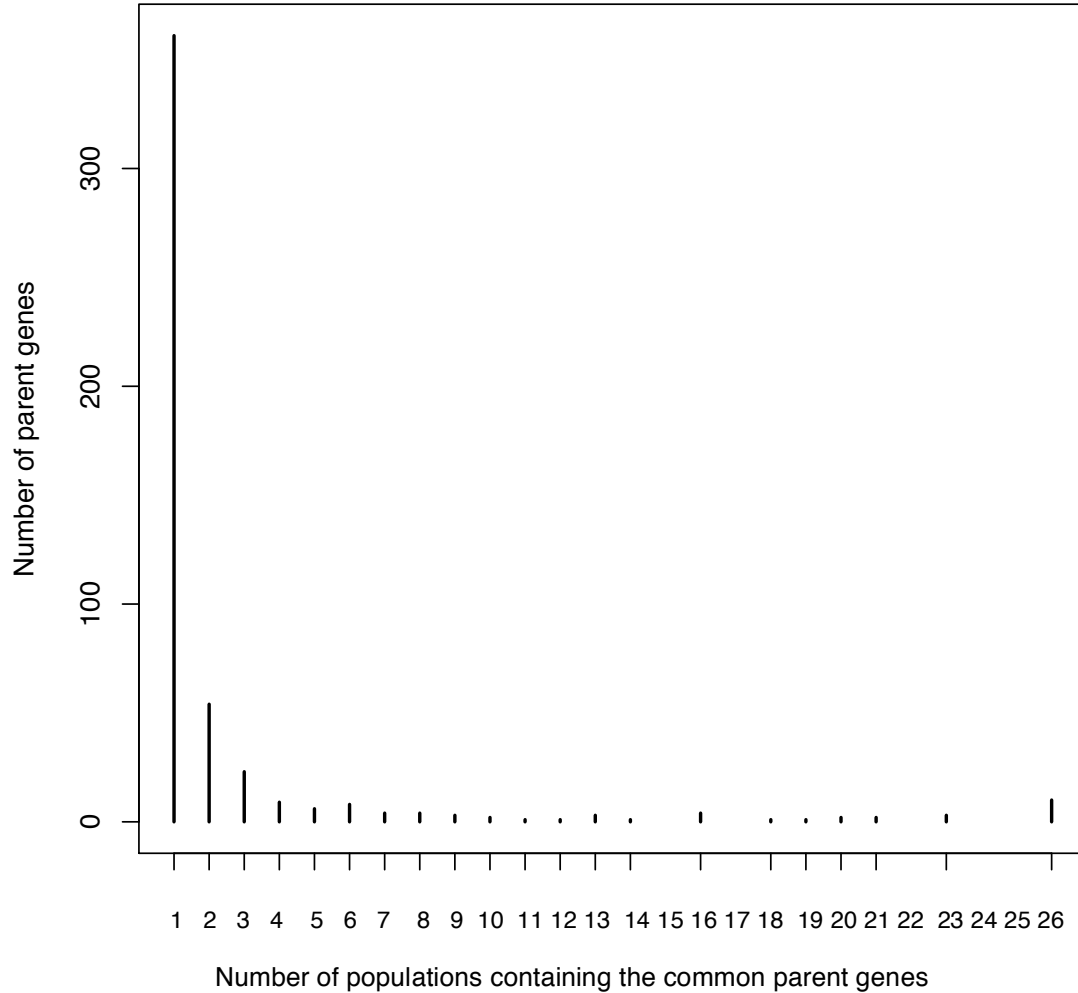

**Fig B. Summary statistics of the retroduplication call set generated based exon junction libraries.** a) – Histogram of novel retroduplication calls per person. b) – Distribution of common parent genes among populations. Two outlier individuals, NA12890 in CEU and NA19473 in LWK, have been excluded while generating the plots.

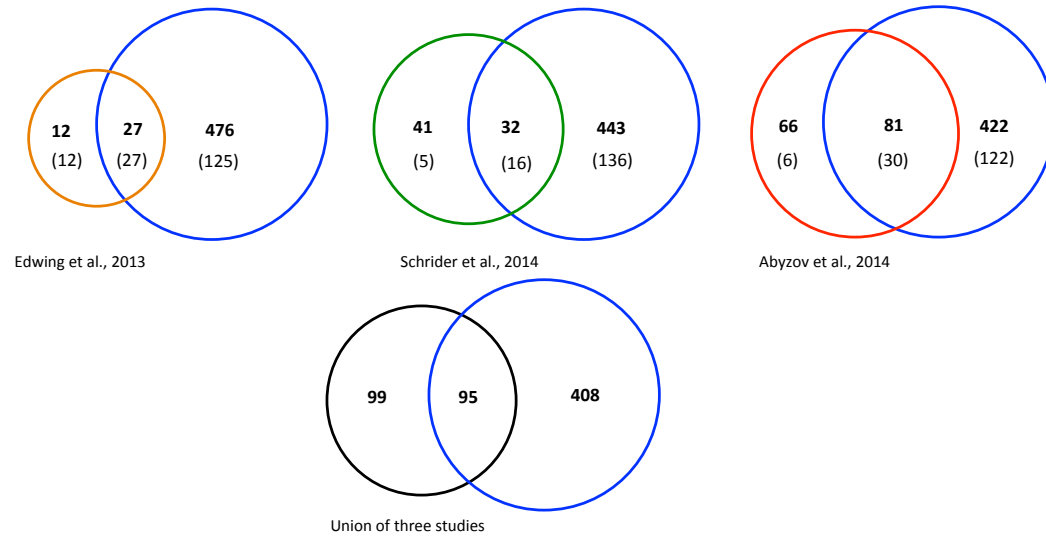

**Fig C. Venn digram of callset comparison between this study and three previous studies.** Concordances are called based on insertion sites if they are available in both datasets. When insertion sites are unknown, we use gene names. Numbers in parentheses are the number of insertion points in agreement. Thses circles are not drawn proportional to actual data size.

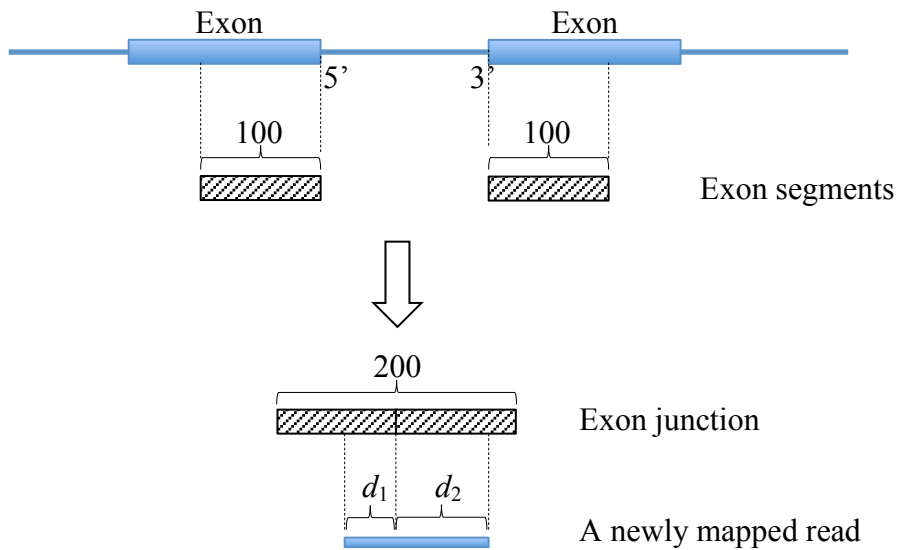

**Fig D. Generating exon junctions, and mapping reads to an exon junction.**

Minimum distance allowed between two exons being joined is 70 bases. Two exon segments adjacent to the joining splice site are extracted, and combined to form an exon junction of length 200 bases. Unmapped reads are mapped against exon junctions.  $d_1$  and  $d_2$  are the number of bases that the read maps to either exon segment.  $\min(d_1, d_2) \geq d$  is required for a newly mapped read to be reported from our pipeline. We also calculate the mismatch rate  $r$  for each mapped read.  $d$  and  $r$  are parameters automatically tuned in the range  $[1, 15]$  and  $[0.00, 0.05]$ , respectively, ensuring the most number of calls from the true exon junction library while satisfying no false call from any decoy library.



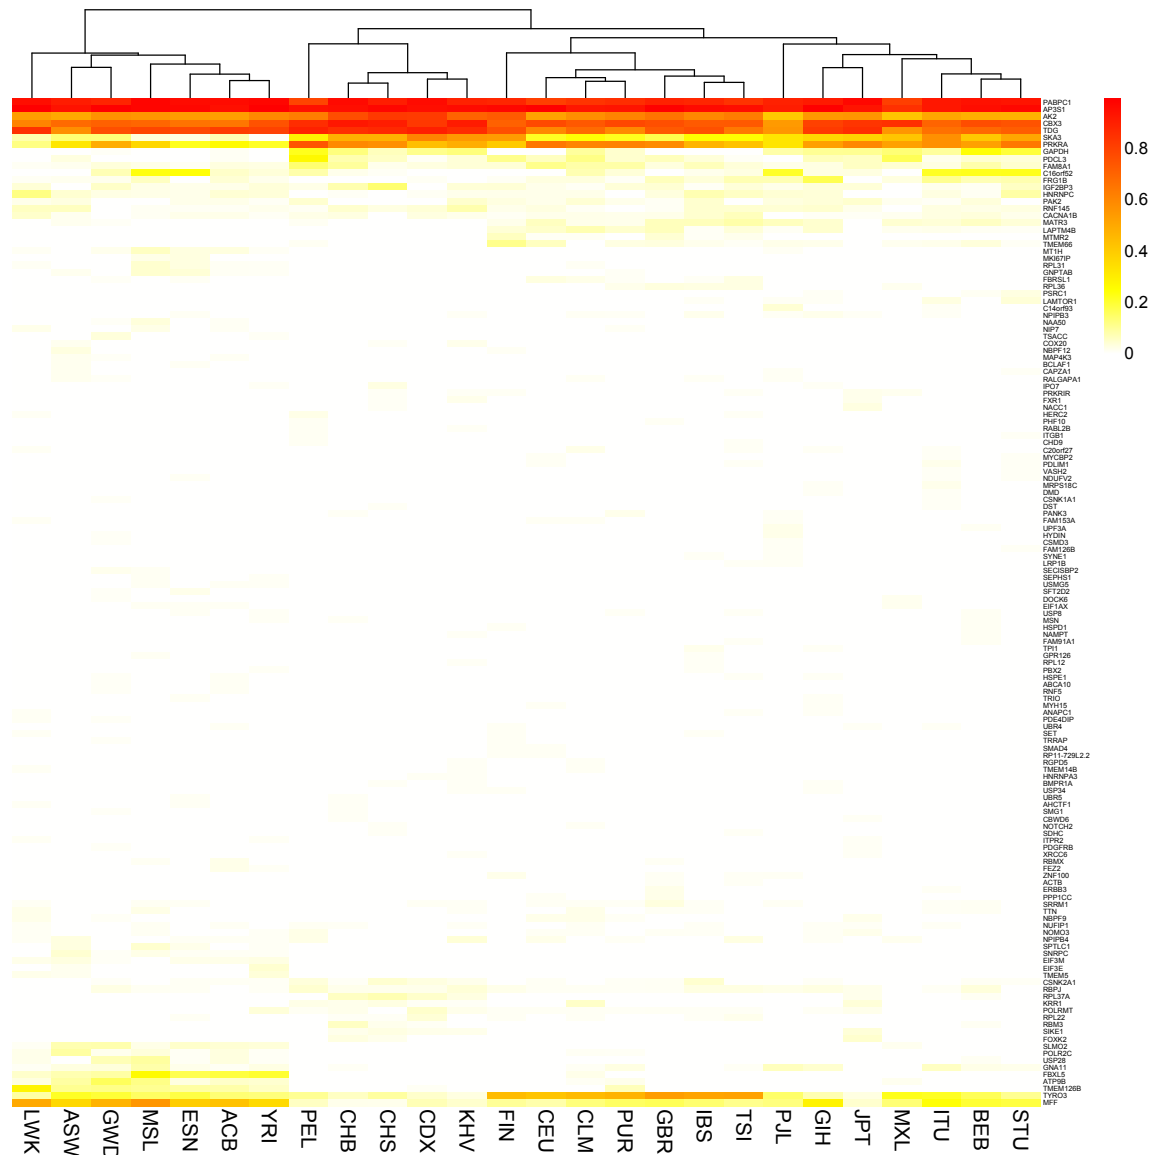

**Fig E. Exploration of 142 retroduplication events based on frequency spectrum.** Frequency spectrum of 142 retroduplication events that are detected in at least two populations. Hierarchical clustering was used.

Parent gene is hom, the retrodup is...

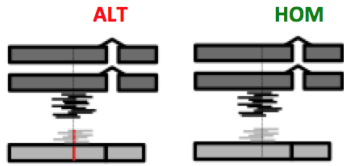

| If the depth is ... | 10X   | 50X    | 100X   |
|---------------------|-------|--------|--------|
| No retrodup         | 99.1% | >99.9% | >99.9% |
| Alt. retrodup       | 6.76% | 0.03%  | <0.01% |
| Ref. retrodup       | 99.7% | >99.9% | >99.9% |

Parent gene is alt, the retrodup is...

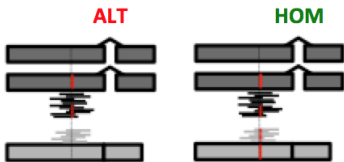

| If the depth is ... | 10X   | 50X    | 100X   |
|---------------------|-------|--------|--------|
| No retrodup         | 89.1% | 99.3%  | >99.9% |
| Alt. retrodup       | 59.7% | 57.5%  | 55.4%  |
| Ref. retrodup       | 92.9% | >99.9% | >99.9% |

**Fig F. A simplified model of retroduplications affecting SNP calling.** We first define the likelihood functions for three genotypes:  $\text{Pois}(n, \text{depth} \cdot (1-e))$  (AA),  $\text{Binom}(n, \text{depth}, 0.5)$  (AB) and  $\text{Pois}(n, \text{depth} \cdot e)$  (BB). The error rate  $e = 0.01$ . We generate all reads from a Poisson distribution with an error rate of 0.01. For genotyping, we picked the one with the highest likelihood and compare it with the ground truth to derive the accuracy as shown in the table. HOM/hom: homozygous/reference allele; ALT/alt: alternative allele.

**Table A. Update of Phase 3 retroduplication identifications from Phase 1.** In our previous study (Abyzov et al., 2013), we identified retroduplications from the 1000 Genomes Project Phase 1 low-coverage whole-genome sequencing data. In the new study, we identified retroduplications from Phase 3 high-coverage sequencing data. Update of this study is summarized in the table.

|                                                                           | Previous study (Abyzov et al., 2013)                         | New study update                                    |
|---------------------------------------------------------------------------|--------------------------------------------------------------|-----------------------------------------------------|
| <b>Detection of novel retroduplications using exon junction libraries</b> |                                                              |                                                     |
| Data                                                                      | Low-coverage whole-genome sequencing (WGS)                   | ILLUMINA high-coverage whole-exome sequencing (WES) |
| Populations                                                               | 986 WGS of 14 populations + 2 WGS trios (YRI trio, CEU trio) | 2,535 WES of 26 populations                         |
| Number of retroduplication calls per person                               | On average 6-10                                              | Median: 6, IQR: 2                                   |
| Number of unique genes with novel exon junctions                          | 147                                                          | 503                                                 |
| Outlier individuals                                                       | 6 JPT individuals                                            | 1 CEU individual and 1 LWK individual               |
| <b>Insertion site detection using mapping of paired end reads</b>         |                                                              |                                                     |
| Data                                                                      | 968 WGS                                                      | 2,535 WGS                                           |
| Number of insertion sites detected                                        | 36 unique genes                                              | 152 unique genes                                    |

**Table B. Population differentiation measure of each retroduplication parent gene.**

Observed  $F_{ST}$  is the observed test statistic from the true populations set. The empirical p-value is calculated from permutations tests, comparing observed  $F_{ST}$  with the null distribution of  $F_{ST}$  derived from 1000 fake population sets. The parent genes are assorted with ascending BH (Benjamini-Hochberg procedure) adjusted p-value. The top 43 parent genes have BH adjusted p-value  $< 0.001$ , and they are significant retroduplication parent genes that can differentiate superpopulations.

|    | Parent Gene Ensembl ID | Observed $F_{ST}$ | p-value | Adjusted p-value (BH) |
|----|------------------------|-------------------|---------|-----------------------|
| 1  | ENSG00000092445        | 0.138278681       | 0       | 0                     |
| 2  | ENSG00000168958        | 0.137309409       | 0       | 0                     |
| 3  | ENSG00000165480        | 0.120808178       | 0       | 0                     |
| 4  | ENSG00000118564        | 0.109889405       | 0       | 0                     |
| 5  | ENSG00000171204        | 0.07846155        | 0       | 0                     |
| 6  | ENSG00000111640        | 0.060451025       | 0       | 0                     |
| 7  | ENSG00000185716        | 0.058092375       | 0       | 0                     |
| 8  | ENSG00000180228        | 0.056955187       | 0       | 0                     |
| 9  | ENSG00000166377        | 0.04989263        | 0       | 0                     |
| 10 | ENSG00000115539        | 0.038428269       | 0       | 0                     |
| 11 | ENSG00000197756        | 0.035297492       | 0       | 0                     |
| 12 | ENSG00000149531        | 0.032854703       | 0       | 0                     |
| 13 | ENSG00000101166        | 0.031702645       | 0       | 0                     |
| 14 | ENSG00000004455        | 0.02975187        | 0       | 0                     |
| 15 | ENSG00000122565        | 0.029516431       | 0       | 0                     |
| 16 | ENSG00000139372        | 0.026314177       | 0       | 0                     |
| 17 | ENSG00000015479        | 0.024405028       | 0       | 0                     |
| 18 | ENSG00000048028        | 0.023831726       | 0       | 0                     |
| 19 | ENSG00000070756        | 0.022783149       | 0       | 0                     |
| 20 | ENSG00000087053        | 0.020313783       | 0       | 0                     |
| 21 | ENSG00000052723        | 0.020214209       | 0       | 0                     |
| 22 | ENSG00000133872        | 0.02011706        | 0       | 0                     |
| 23 | ENSG00000104341        | 0.017653856       | 0       | 0                     |
| 24 | ENSG00000102978        | 0.017058594       | 0       | 0                     |
| 25 | ENSG00000141568        | 0.015530902       | 0       | 0                     |
| 26 | ENSG00000205358        | 0.014956016       | 0       | 0                     |
| 27 | ENSG00000088256        | 0.014498964       | 0       | 0                     |
| 28 | ENSG00000111615        | 0.013778157       | 0       | 0                     |
| 29 | ENSG00000149100        | 0.013289565       | 0       | 0                     |
| 30 | ENSG00000149357        | 0.012697414       | 0       | 0                     |
| 31 | ENSG00000102317        | 0.01203019        | 0       | 0                     |
| 32 | ENSG00000130255        | 0.010837415       | 0       | 0                     |
| 33 | ENSG00000111670        | 0.010644515       | 0       | 0                     |

|    |                 |             |       |             |
|----|-----------------|-------------|-------|-------------|
| 34 | ENSG00000137414 | 0.010048388 | 0     | 0           |
| 35 | ENSG00000092199 | 0.009994358 | 0     | 0           |
| 36 | ENSG00000090054 | 0.009955327 | 0     | 0           |
| 37 | ENSG00000124562 | 0.009955327 | 0     | 0           |
| 38 | ENSG00000177879 | 0.008665282 | 0     | 0           |
| 39 | ENSG00000100802 | 0.008163628 | 0     | 0           |
| 40 | ENSG00000101444 | 0.008163628 | 0     | 0           |
| 41 | ENSG00000134222 | 0.008163628 | 0     | 0           |
| 42 | ENSG00000104408 | 0.006629006 | 0     | 0           |
| 43 | ENSG00000112787 | 0.006022602 | 0     | 0           |
| 44 | ENSG00000071082 | 0.009566276 | 0.001 | 0.010934783 |
| 45 | ENSG00000118600 | 0.007736901 | 0.001 | 0.010934783 |
| 46 | ENSG00000120438 | 0.006629006 | 0.001 | 0.010934783 |
| 47 | ENSG00000114416 | 0.007750092 | 0.002 | 0.021404255 |
| 48 | ENSG00000121579 | 0.005521986 | 0.004 | 0.041061224 |
| 49 | ENSG00000155438 | 0.005521986 | 0.004 | 0.041061224 |
| 50 | ENSG00000160877 | 0.006197622 | 0.005 | 0.0503      |
| 51 | ENSG00000163467 | 0.005521986 | 0.006 | 0.059176471 |
| 52 | ENSG00000136231 | 0.0052821   | 0.008 | 0.075924528 |
| 53 | ENSG00000163319 | 0.004894305 | 0.008 | 0.075924528 |
| 54 | ENSG00000169062 | 0.004894305 | 0.009 | 0.083833333 |
| 55 | ENSG00000197020 | 0.004789575 | 0.011 | 0.098803571 |
| 56 | ENSG00000145860 | 0.004779859 | 0.011 | 0.098803571 |
| 57 | ENSG00000176915 | 0.004894305 | 0.013 | 0.114719298 |
| 58 | ENSG00000186298 | 0.004773668 | 0.016 | 0.138758621 |
| 59 | ENSG00000156467 | 0.004896106 | 0.017 | 0.144932203 |
| 60 | ENSG00000099821 | 0.004572527 | 0.018 | 0.14842623  |
| 61 | ENSG00000116251 | 0.004114264 | 0.018 | 0.14842623  |
| 62 | ENSG00000132603 | 0.004352587 | 0.022 | 0.178483871 |
| 63 | ENSG00000171055 | 0.003310573 | 0.029 | 0.231539683 |
| 64 | ENSG00000213064 | 0.003310573 | 0.037 | 0.290796875 |
| 65 | ENSG00000187742 | 0.003310573 | 0.04  | 0.309538462 |
| 66 | ENSG00000077809 | 0.003261581 | 0.042 | 0.320090909 |
| 67 | ENSG00000136144 | 0.003310573 | 0.043 | 0.322820896 |
| 68 | ENSG00000011566 | 0.003310573 | 0.044 | 0.325470588 |
| 69 | ENSG00000166454 | 0.003310573 | 0.047 | 0.342623188 |
| 70 | ENSG00000173915 | 0.003310573 | 0.05  | 0.359285714 |
| 71 | ENSG00000107438 | 0.003263524 | 0.055 | 0.389647887 |
| 72 | ENSG00000155744 | 0.003261581 | 0.056 | 0.391222222 |
| 73 | ENSG00000182899 | 0.003261581 | 0.063 | 0.43409589  |
| 74 | ENSG00000198947 | 0.003261581 | 0.064 | 0.435027027 |

|     |                 |             |       |             |
|-----|-----------------|-------------|-------|-------------|
| 75  | ENSG00000204628 | 0.003261581 | 0.065 | 0.435933333 |
| 76  | ENSG00000143494 | 0.003261581 | 0.067 | 0.443434211 |
| 77  | ENSG00000137492 | 0.003223297 | 0.072 | 0.470337662 |
| 78  | ENSG00000156795 | 0.003181188 | 0.084 | 0.541692308 |
| 79  | ENSG00000101266 | 0.003062007 | 0.098 | 0.611082645 |
| 80  | ENSG00000141646 | 0.003181188 | 0.106 | 0.611082645 |
| 81  | ENSG00000267699 | 0.003181188 | 0.106 | 0.611082645 |
| 82  | ENSG00000075624 | 0.003181188 | 0.108 | 0.611082645 |
| 83  | ENSG00000203667 | 0.003169033 | 0.11  | 0.611082645 |
| 84  | ENSG00000203943 | 0.002447086 | 0.116 | 0.611082645 |
| 85  | ENSG00000204790 | 0.003096362 | 0.12  | 0.611082645 |
| 86  | ENSG00000167004 | 0.003096362 | 0.124 | 0.611082645 |
| 87  | ENSG00000131732 | 0.002447086 | 0.124 | 0.611082645 |
| 88  | ENSG00000066027 | 0.002447086 | 0.126 | 0.611082645 |
| 89  | ENSG00000185842 | 0.002447086 | 0.126 | 0.611082645 |
| 90  | ENSG00000123545 | 0.002447086 | 0.13  | 0.611082645 |
| 91  | ENSG00000197930 | 0.002447086 | 0.13  | 0.611082645 |
| 92  | ENSG00000169139 | 0.002447086 | 0.131 | 0.611082645 |
| 93  | ENSG00000089157 | 0.002447086 | 0.132 | 0.611082645 |
| 94  | ENSG00000185305 | 0.002447086 | 0.132 | 0.611082645 |
| 95  | ENSG00000196419 | 0.003096362 | 0.133 | 0.611082645 |
| 96  | ENSG00000132692 | 0.002447086 | 0.133 | 0.611082645 |
| 97  | ENSG00000137601 | 0.002447086 | 0.133 | 0.611082645 |
| 98  | ENSG00000143341 | 0.002447086 | 0.133 | 0.611082645 |
| 99  | ENSG00000163492 | 0.002447086 | 0.133 | 0.611082645 |
| 100 | ENSG00000135457 | 0.002447086 | 0.134 | 0.611082645 |
| 101 | ENSG00000198554 | 0.002447086 | 0.134 | 0.611082645 |
| 102 | ENSG00000204262 | 0.002447086 | 0.134 | 0.611082645 |
| 103 | ENSG00000106636 | 0.002447086 | 0.135 | 0.611082645 |
| 104 | ENSG00000116001 | 0.002447086 | 0.135 | 0.611082645 |
| 105 | ENSG00000155313 | 0.002447086 | 0.135 | 0.611082645 |
| 106 | ENSG00000173674 | 0.002503289 | 0.137 | 0.611082645 |
| 107 | ENSG00000100030 | 0.002447086 | 0.137 | 0.611082645 |
| 108 | ENSG00000113013 | 0.002447086 | 0.137 | 0.611082645 |
| 109 | ENSG00000188647 | 0.002447086 | 0.137 | 0.611082645 |
| 110 | ENSG00000165898 | 0.002447086 | 0.138 | 0.611082645 |
| 111 | ENSG00000118113 | 0.002447086 | 0.139 | 0.611082645 |
| 112 | ENSG00000164253 | 0.002447086 | 0.139 | 0.611082645 |
| 113 | ENSG00000078304 | 0.002447086 | 0.14  | 0.611082645 |
| 114 | ENSG00000004866 | 0.002447086 | 0.142 | 0.611082645 |
| 115 | ENSG00000125144 | 0.002447086 | 0.142 | 0.611082645 |

|     |                 |             |       |             |
|-----|-----------------|-------------|-------|-------------|
| 116 | ENSG00000153956 | 0.002447086 | 0.142 | 0.611082645 |
| 117 | ENSG00000145730 | 0.002447086 | 0.143 | 0.611082645 |
| 118 | ENSG00000130159 | 0.002447086 | 0.144 | 0.611082645 |
| 119 | ENSG00000163877 | 0.002447086 | 0.146 | 0.611082645 |
| 120 | ENSG00000164032 | 0.002447086 | 0.146 | 0.611082645 |
| 121 | ENSG00000185261 | 0.002447086 | 0.147 | 0.611082645 |
| 122 | ENSG00000149273 | 0.003096362 | 0.149 | 0.613414634 |
| 123 | ENSG00000146776 | 0.002447086 | 0.15  | 0.613414634 |
| 124 | ENSG00000170144 | 0.003096362 | 0.152 | 0.616580645 |
| 125 | ENSG00000153391 | 0.003096362 | 0.155 | 0.618769841 |
| 126 | ENSG00000025156 | 0.002447086 | 0.155 | 0.618769841 |
| 127 | ENSG00000005810 | 0.002178645 | 0.157 | 0.621818898 |
| 128 | ENSG00000170906 | 0.002447086 | 0.16  | 0.62875     |
| 129 | ENSG00000133818 | 0.002447086 | 0.167 | 0.651170543 |
| 130 | ENSG00000178104 | 0.002206176 | 0.197 | 0.760259542 |
| 131 | ENSG00000086475 | 0.002206176 | 0.198 | 0.760259542 |
| 132 | ENSG00000147274 | 0.002288754 | 0.2   | 0.762007463 |
| 133 | ENSG00000029363 | 0.002206176 | 0.202 | 0.762007463 |
| 134 | ENSG00000204308 | 0.002206176 | 0.203 | 0.762007463 |
| 135 | ENSG00000065361 | 0.002138433 | 0.206 | 0.767540741 |
| 136 | ENSG00000120137 | 0.002256828 | 0.209 | 0.772992647 |
| 137 | ENSG00000111669 | 0.002138433 | 0.216 | 0.786073593 |
| 138 | ENSG00000154263 | 0.002206176 | 0.218 | 0.786073593 |
| 139 | ENSG00000128731 | 0.002135409 | 0.243 | 0.786073593 |
| 140 | ENSG00000205339 | 0.002229863 | 0.246 | 0.786073593 |
| 141 | ENSG00000107779 | 0.00208186  | 0.248 | 0.786073593 |
| 142 | ENSG00000150093 | 0.001644321 | 0.264 | 0.786073593 |
| 143 | ENSG00000150760 | 0.001630146 | 0.293 | 0.786073593 |
| 144 | ENSG00000166743 | 0.001630146 | 0.293 | 0.786073593 |
| 145 | ENSG00000143436 | 0.001630146 | 0.298 | 0.786073593 |
| 146 | ENSG00000110700 | 0.001630146 | 0.301 | 0.786073593 |
| 147 | ENSG00000163638 | 0.001630146 | 0.301 | 0.786073593 |
| 148 | ENSG00000077380 | 0.001630146 | 0.309 | 0.786073593 |
| 149 | ENSG00000133112 | 0.001630146 | 0.309 | 0.786073593 |
| 150 | ENSG00000181163 | 0.001630146 | 0.309 | 0.786073593 |
| 151 | ENSG00000148408 | 0.001858721 | 0.311 | 0.786073593 |
| 152 | ENSG00000196586 | 0.001630146 | 0.312 | 0.786073593 |
| 153 | ENSG00000198420 | 0.001630146 | 0.313 | 0.786073593 |
| 154 | ENSG00000157856 | 0.001630146 | 0.314 | 0.786073593 |
| 155 | ENSG00000118307 | 0.001630146 | 0.315 | 0.786073593 |
| 156 | ENSG00000130024 | 0.001624223 | 0.315 | 0.786073593 |

|     |                 |             |       |             |
|-----|-----------------|-------------|-------|-------------|
| 157 | ENSG00000112379 | 0.001630146 | 0.316 | 0.786073593 |
| 158 | ENSG00000213741 | 0.001630146 | 0.316 | 0.786073593 |
| 159 | ENSG00000064666 | 0.001630146 | 0.317 | 0.786073593 |
| 160 | ENSG00000171502 | 0.001630146 | 0.317 | 0.786073593 |
| 161 | ENSG00000243716 | 0.001630146 | 0.317 | 0.786073593 |
| 162 | ENSG00000177200 | 0.001624223 | 0.317 | 0.786073593 |
| 163 | ENSG00000089472 | 0.001630146 | 0.32  | 0.786073593 |
| 164 | ENSG00000157483 | 0.001630146 | 0.32  | 0.786073593 |
| 165 | ENSG00000048544 | 0.001630146 | 0.321 | 0.786073593 |
| 166 | ENSG00000174827 | 0.001630146 | 0.321 | 0.786073593 |
| 167 | ENSG00000100083 | 0.001630146 | 0.322 | 0.786073593 |
| 168 | ENSG00000101367 | 0.001630146 | 0.322 | 0.786073593 |
| 169 | ENSG00000116489 | 0.002016079 | 0.323 | 0.786073593 |
| 170 | ENSG00000115760 | 0.001630146 | 0.324 | 0.786073593 |
| 171 | ENSG00000198648 | 0.001630146 | 0.324 | 0.786073593 |
| 172 | ENSG00000213585 | 0.001630146 | 0.326 | 0.786073593 |
| 173 | ENSG00000003402 | 0.001630146 | 0.327 | 0.786073593 |
| 174 | ENSG00000049759 | 0.001630146 | 0.327 | 0.786073593 |
| 175 | ENSG00000116497 | 0.001630146 | 0.327 | 0.786073593 |
| 176 | ENSG00000116809 | 0.001630146 | 0.327 | 0.786073593 |
| 177 | ENSG00000134333 | 0.001630146 | 0.327 | 0.786073593 |
| 178 | ENSG00000152208 | 0.001630146 | 0.327 | 0.786073593 |
| 179 | ENSG00000161203 | 0.001630146 | 0.327 | 0.786073593 |
| 180 | ENSG00000119335 | 0.001962463 | 0.328 | 0.786073593 |
| 181 | ENSG00000054523 | 0.001630146 | 0.328 | 0.786073593 |
| 182 | ENSG00000185088 | 0.001630146 | 0.328 | 0.786073593 |
| 183 | ENSG00000174093 | 0.001630146 | 0.329 | 0.786073593 |
| 184 | ENSG00000178127 | 0.002016079 | 0.33  | 0.786073593 |
| 185 | ENSG00000254685 | 0.001630146 | 0.33  | 0.786073593 |
| 186 | ENSG00000145147 | 0.001630146 | 0.331 | 0.786073593 |
| 187 | ENSG00000114867 | 0.001630146 | 0.332 | 0.786073593 |
| 188 | ENSG00000133056 | 0.001630146 | 0.333 | 0.786073593 |
| 189 | ENSG00000120658 | 0.001630146 | 0.334 | 0.786073593 |
| 190 | ENSG00000132694 | 0.001630146 | 0.334 | 0.786073593 |
| 191 | ENSG00000145216 | 0.001630146 | 0.334 | 0.786073593 |
| 192 | ENSG00000163312 | 0.001630146 | 0.334 | 0.786073593 |
| 193 | ENSG00000163389 | 0.001630146 | 0.334 | 0.786073593 |
| 194 | ENSG00000165521 | 0.001630146 | 0.334 | 0.786073593 |
| 195 | ENSG00000198848 | 0.001630146 | 0.334 | 0.786073593 |
| 196 | ENSG00000241973 | 0.001630146 | 0.334 | 0.786073593 |
| 197 | ENSG00000243678 | 0.001630146 | 0.334 | 0.786073593 |



|     |                 |             |       |             |
|-----|-----------------|-------------|-------|-------------|
| 198 | ENSG00000101132 | 0.001630146 | 0.335 | 0.786073593 |
| 199 | ENSG00000184445 | 0.001630146 | 0.335 | 0.786073593 |
| 200 | ENSG00000139144 | 0.001630146 | 0.337 | 0.786073593 |
| 201 | ENSG00000188641 | 0.001630146 | 0.337 | 0.786073593 |
| 202 | ENSG00000081026 | 0.001630146 | 0.338 | 0.786073593 |
| 203 | ENSG00000122643 | 0.001630146 | 0.338 | 0.786073593 |
| 204 | ENSG00000157423 | 0.002016079 | 0.339 | 0.786073593 |
| 205 | ENSG00000074219 | 0.001630146 | 0.339 | 0.786073593 |
| 206 | ENSG00000072818 | 0.001630146 | 0.34  | 0.786073593 |
| 207 | ENSG00000082516 | 0.001630146 | 0.34  | 0.786073593 |
| 208 | ENSG00000135837 | 0.001630146 | 0.34  | 0.786073593 |
| 209 | ENSG00000136895 | 0.001630146 | 0.34  | 0.786073593 |
| 210 | ENSG00000133962 | 0.001630146 | 0.341 | 0.786073593 |
| 211 | ENSG00000163029 | 0.001630146 | 0.341 | 0.786073593 |
| 212 | ENSG00000181929 | 0.001630146 | 0.342 | 0.786073593 |
| 213 | ENSG00000196712 | 0.001630146 | 0.342 | 0.786073593 |
| 214 | ENSG00000213759 | 0.001630146 | 0.342 | 0.786073593 |
| 215 | ENSG00000116748 | 0.001630146 | 0.344 | 0.786073593 |
| 216 | ENSG00000123505 | 0.001630146 | 0.344 | 0.786073593 |
| 217 | ENSG00000007392 | 0.001630146 | 0.345 | 0.786073593 |
| 218 | ENSG00000109270 | 0.001630146 | 0.346 | 0.786073593 |
| 219 | ENSG00000198586 | 0.001630146 | 0.346 | 0.786073593 |
| 220 | ENSG00000143515 | 0.001630146 | 0.349 | 0.786073593 |
| 221 | ENSG00000197136 | 0.001630146 | 0.349 | 0.786073593 |
| 222 | ENSG00000079805 | 0.001630146 | 0.356 | 0.786073593 |
| 223 | ENSG00000085788 | 0.001630146 | 0.358 | 0.786073593 |
| 224 | ENSG00000142609 | 0.001630146 | 0.358 | 0.786073593 |
| 225 | ENSG00000165995 | 0.001630146 | 0.358 | 0.786073593 |
| 226 | ENSG00000173812 | 0.001630146 | 0.358 | 0.786073593 |
| 227 | ENSG00000187323 | 0.001630146 | 0.358 | 0.786073593 |
| 228 | ENSG00000077522 | 0.001630146 | 0.36  | 0.786073593 |
| 229 | ENSG00000137714 | 0.001630146 | 0.36  | 0.786073593 |
| 230 | ENSG00000183914 | 0.001630146 | 0.36  | 0.786073593 |
| 231 | ENSG00000134250 | 0.001603016 | 0.361 | 0.786073593 |
| 232 | ENSG00000138792 | 0.001630146 | 0.364 | 0.789189655 |
| 233 | ENSG00000079974 | 0.001603016 | 0.373 | 0.80523176  |
| 234 | ENSG00000015568 | 0.001603016 | 0.387 | 0.831884615 |
| 235 | ENSG00000168214 | 0.001613257 | 0.408 | 0.873293617 |
| 236 | ENSG00000180370 | 0.001505758 | 0.416 | 0.886644068 |
| 237 | ENSG00000130158 | 0.00138047  | 0.444 | 0.917725166 |
| 238 | ENSG00000168614 | 0.001532636 | 0.45  | 0.917725166 |

|     |                 |             |       |             |
|-----|-----------------|-------------|-------|-------------|
| 239 | ENSG00000186275 | 0.001474764 | 0.491 | 0.917725166 |
| 240 | ENSG00000101220 | 0.001458378 | 0.493 | 0.917725166 |
| 241 | ENSG00000168028 | 0.001589966 | 0.502 | 0.917725166 |
| 242 | ENSG00000156802 | 0.001589966 | 0.504 | 0.917725166 |
| 243 | ENSG00000144381 | 0.001215591 | 0.506 | 0.917725166 |
| 244 | ENSG00000083857 | 0.001589966 | 0.508 | 0.917725166 |
| 245 | ENSG00000170242 | 0.001589966 | 0.508 | 0.917725166 |
| 246 | ENSG00000174799 | 0.001589966 | 0.512 | 0.917725166 |
| 247 | ENSG00000180777 | 0.001589966 | 0.514 | 0.917725166 |
| 248 | ENSG00000257103 | 0.001589966 | 0.516 | 0.917725166 |
| 249 | ENSG00000042781 | 0.001589966 | 0.517 | 0.917725166 |
| 250 | ENSG00000066813 | 0.001589966 | 0.517 | 0.917725166 |
| 251 | ENSG00000131018 | 0.001215591 | 0.518 | 0.917725166 |
| 252 | ENSG00000118965 | 0.001589966 | 0.519 | 0.917725166 |
| 253 | ENSG00000168702 | 0.001215591 | 0.519 | 0.917725166 |
| 254 | ENSG00000135976 | 0.001589966 | 0.52  | 0.917725166 |
| 255 | ENSG00000136888 | 0.001589966 | 0.52  | 0.917725166 |
| 256 | ENSG00000152558 | 0.001589966 | 0.52  | 0.917725166 |
| 257 | ENSG00000056097 | 0.001589966 | 0.523 | 0.917725166 |
| 258 | ENSG00000086758 | 0.001589966 | 0.523 | 0.917725166 |
| 259 | ENSG00000122512 | 0.001589966 | 0.523 | 0.917725166 |
| 260 | ENSG00000112282 | 0.001589966 | 0.524 | 0.917725166 |
| 261 | ENSG00000171314 | 0.001589966 | 0.524 | 0.917725166 |
| 262 | ENSG00000197728 | 0.001589966 | 0.524 | 0.917725166 |
| 263 | ENSG00000123104 | 0.001460621 | 0.524 | 0.917725166 |
| 264 | ENSG00000117245 | 0.001589966 | 0.525 | 0.917725166 |
| 265 | ENSG00000183354 | 0.001589966 | 0.525 | 0.917725166 |
| 266 | ENSG00000165084 | 0.001589966 | 0.526 | 0.917725166 |
| 267 | ENSG00000166747 | 0.001589966 | 0.526 | 0.917725166 |
| 268 | ENSG00000186998 | 0.001589966 | 0.526 | 0.917725166 |
| 269 | ENSG00000114857 | 0.001589966 | 0.527 | 0.917725166 |
| 270 | ENSG00000147050 | 0.001589966 | 0.527 | 0.917725166 |
| 271 | ENSG00000153201 | 0.001589966 | 0.528 | 0.917725166 |
| 272 | ENSG00000176853 | 0.001215591 | 0.529 | 0.917725166 |
| 273 | ENSG00000112706 | 0.001589966 | 0.53  | 0.917725166 |
| 274 | ENSG00000139218 | 0.001589966 | 0.531 | 0.917725166 |
| 275 | ENSG00000140992 | 0.001589966 | 0.531 | 0.917725166 |
| 276 | ENSG00000152348 | 0.001589966 | 0.532 | 0.917725166 |
| 277 | ENSG00000053108 | 0.001589966 | 0.533 | 0.917725166 |
| 278 | ENSG00000143702 | 0.001589966 | 0.533 | 0.917725166 |
| 279 | ENSG00000150459 | 0.001589966 | 0.533 | 0.917725166 |

|     |                 |             |       |             |
|-----|-----------------|-------------|-------|-------------|
| 280 | ENSG00000149311 | 0.001589966 | 0.534 | 0.917725166 |
| 281 | ENSG00000111247 | 0.001589966 | 0.535 | 0.917725166 |
| 282 | ENSG00000197006 | 0.001589966 | 0.535 | 0.917725166 |
| 283 | ENSG00000119685 | 0.001589966 | 0.536 | 0.917725166 |
| 284 | ENSG00000134453 | 0.001589966 | 0.536 | 0.917725166 |
| 285 | ENSG00000198626 | 0.001589966 | 0.537 | 0.917725166 |
| 286 | ENSG00000115839 | 0.001589966 | 0.538 | 0.917725166 |
| 287 | ENSG00000155561 | 0.001589966 | 0.538 | 0.917725166 |
| 288 | ENSG00000165181 | 0.001589966 | 0.538 | 0.917725166 |
| 289 | ENSG00000165899 | 0.001589966 | 0.538 | 0.917725166 |
| 290 | ENSG00000083290 | 0.001589966 | 0.54  | 0.917725166 |
| 291 | ENSG00000132570 | 0.001589966 | 0.54  | 0.917725166 |
| 292 | ENSG00000183091 | 0.001589966 | 0.541 | 0.917725166 |
| 293 | ENSG00000154447 | 0.001589966 | 0.542 | 0.917725166 |
| 294 | ENSG00000116678 | 0.001589966 | 0.543 | 0.917725166 |
| 295 | ENSG00000157388 | 0.001589966 | 0.545 | 0.917725166 |
| 296 | ENSG00000144821 | 0.001215591 | 0.545 | 0.917725166 |
| 297 | ENSG00000177600 | 0.001589966 | 0.548 | 0.917725166 |
| 298 | ENSG00000143207 | 0.001589966 | 0.549 | 0.917725166 |
| 299 | ENSG00000103495 | 0.001589966 | 0.55  | 0.917725166 |
| 300 | ENSG00000198399 | 0.001589966 | 0.55  | 0.917725166 |
| 301 | ENSG00000154059 | 0.001589966 | 0.551 | 0.917725166 |
| 302 | ENSG00000153207 | 0.001460621 | 0.551 | 0.917725166 |
| 303 | ENSG00000162927 | 0.001589966 | 0.555 | 0.921336634 |
| 304 | ENSG00000103657 | 0.001589966 | 0.559 | 0.924924342 |
| 305 | ENSG00000264364 | 0.001589966 | 0.564 | 0.929491909 |
| 306 | ENSG00000169499 | 0.001589966 | 0.567 | 0.929491909 |
| 307 | ENSG00000157350 | 0.001589966 | 0.568 | 0.929491909 |
| 308 | ENSG00000185864 | 0.001215934 | 0.57  | 0.929491909 |
| 309 | ENSG00000169246 | 0.001203715 | 0.571 | 0.929491909 |
| 310 | ENSG00000151914 | 0.001194385 | 0.605 | 0.98166129  |
| 311 | ENSG00000105835 | 0.001194385 | 0.612 | 0.989826367 |
| 312 | ENSG00000143252 | 0.001174287 | 0.678 | 0.999534704 |
| 313 | ENSG00000197958 | 0.001174287 | 0.688 | 0.999534704 |
| 314 | ENSG00000140319 | 0.00154757  | 0.712 | 0.999534704 |
| 315 | ENSG00000134970 | 0.00154757  | 0.714 | 0.999534704 |
| 316 | ENSG00000146574 | 0.00154757  | 0.714 | 0.999534704 |
| 317 | ENSG00000243414 | 0.00154757  | 0.714 | 0.999534704 |
| 318 | ENSG00000251201 | 0.00154757  | 0.714 | 0.999534704 |
| 319 | ENSG00000163605 | 0.00154757  | 0.716 | 0.999534704 |
| 320 | ENSG00000164118 | 0.00154757  | 0.716 | 0.999534704 |

|     |                 |            |       |             |
|-----|-----------------|------------|-------|-------------|
| 321 | ENSG00000170160 | 0.00154757 | 0.717 | 0.999534704 |
| 322 | ENSG00000047457 | 0.00154757 | 0.718 | 0.999534704 |
| 323 | ENSG00000128699 | 0.00154757 | 0.718 | 0.999534704 |
| 324 | ENSG00000197563 | 0.00154757 | 0.718 | 0.999534704 |
| 325 | ENSG00000141552 | 0.00154757 | 0.719 | 0.999534704 |
| 326 | ENSG00000121741 | 0.00154757 | 0.723 | 0.999534704 |
| 327 | ENSG00000139579 | 0.00154757 | 0.723 | 0.999534704 |
| 328 | ENSG00000146350 | 0.00154757 | 0.724 | 0.999534704 |
| 329 | ENSG00000188906 | 0.00154757 | 0.724 | 0.999534704 |
| 330 | ENSG00000096063 | 0.00154757 | 0.725 | 0.999534704 |
| 331 | ENSG00000066933 | 0.00154757 | 0.726 | 0.999534704 |
| 332 | ENSG00000156374 | 0.00154757 | 0.727 | 0.999534704 |
| 333 | ENSG00000167460 | 0.00154757 | 0.728 | 0.999534704 |
| 334 | ENSG00000118997 | 0.00154757 | 0.731 | 0.999534704 |
| 335 | ENSG00000126787 | 0.00154757 | 0.731 | 0.999534704 |
| 336 | ENSG00000136810 | 0.00154757 | 0.733 | 0.999534704 |
| 337 | ENSG00000138688 | 0.00154757 | 0.733 | 0.999534704 |
| 338 | ENSG00000205359 | 0.00154757 | 0.733 | 0.999534704 |
| 339 | ENSG00000124789 | 0.00154757 | 0.734 | 0.999534704 |
| 340 | ENSG00000175387 | 0.00154757 | 0.734 | 0.999534704 |
| 341 | ENSG00000042317 | 0.00154757 | 0.735 | 0.999534704 |
| 342 | ENSG00000147679 | 0.00154757 | 0.735 | 0.999534704 |
| 343 | ENSG00000140157 | 0.00154757 | 0.737 | 0.999534704 |
| 344 | ENSG00000165732 | 0.00154757 | 0.737 | 0.999534704 |
| 345 | ENSG00000213995 | 0.00154757 | 0.737 | 0.999534704 |
| 346 | ENSG00000008128 | 0.00154757 | 0.738 | 0.999534704 |
| 347 | ENSG00000035141 | 0.00154757 | 0.738 | 0.999534704 |
| 348 | ENSG00000090402 | 0.00154757 | 0.738 | 0.999534704 |
| 349 | ENSG00000104413 | 0.00154757 | 0.738 | 0.999534704 |
| 350 | ENSG00000152818 | 0.00154757 | 0.738 | 0.999534704 |
| 351 | ENSG00000160075 | 0.00154757 | 0.738 | 0.999534704 |
| 352 | ENSG00000158321 | 0.00154757 | 0.739 | 0.999534704 |
| 353 | ENSG00000060718 | 0.00154757 | 0.74  | 0.999534704 |
| 354 | ENSG00000147403 | 0.00154757 | 0.74  | 0.999534704 |
| 355 | ENSG00000122008 | 0.00154757 | 0.742 | 0.999534704 |
| 356 | ENSG00000152484 | 0.00154757 | 0.742 | 0.999534704 |
| 357 | ENSG00000124721 | 0.00154757 | 0.743 | 0.999534704 |
| 358 | ENSG00000167721 | 0.00154757 | 0.743 | 0.999534704 |
| 359 | ENSG00000127980 | 0.00154757 | 0.744 | 0.999534704 |
| 360 | ENSG00000104613 | 0.00154757 | 0.745 | 0.999534704 |
| 361 | ENSG00000127184 | 0.00154757 | 0.746 | 0.999534704 |

|     |                 |             |       |             |
|-----|-----------------|-------------|-------|-------------|
| 362 | ENSG00000205726 | 0.00154757  | 0.746 | 0.999534704 |
| 363 | ENSG00000115541 | 0.000921411 | 0.746 | 0.999534704 |
| 364 | ENSG00000163754 | 0.00154757  | 0.748 | 0.999534704 |
| 365 | ENSG00000188219 | 0.00154757  | 0.748 | 0.999534704 |
| 366 | ENSG00000023228 | 0.00154757  | 0.75  | 0.999534704 |
| 367 | ENSG00000145592 | 0.00154757  | 0.75  | 0.999534704 |
| 368 | ENSG00000163554 | 0.00154757  | 0.75  | 0.999534704 |
| 369 | ENSG00000137312 | 0.00154757  | 0.751 | 0.999534704 |
| 370 | ENSG00000151067 | 0.00154757  | 0.751 | 0.999534704 |
| 371 | ENSG00000068878 | 0.00154757  | 0.752 | 0.999534704 |
| 372 | ENSG00000134287 | 0.00154757  | 0.752 | 0.999534704 |
| 373 | ENSG00000143543 | 0.00154757  | 0.752 | 0.999534704 |
| 374 | ENSG00000163539 | 0.00154757  | 0.752 | 0.999534704 |
| 375 | ENSG00000272822 | 0.00154757  | 0.752 | 0.999534704 |
| 376 | ENSG00000100316 | 0.00154757  | 0.753 | 0.999534704 |
| 377 | ENSG00000128585 | 0.00154757  | 0.753 | 0.999534704 |
| 378 | ENSG00000110200 | 0.00154757  | 0.755 | 0.999534704 |
| 379 | ENSG00000078114 | 0.00154757  | 0.758 | 0.999534704 |
| 380 | ENSG00000122966 | 0.00154757  | 0.759 | 0.999534704 |
| 381 | ENSG00000180694 | 0.00154757  | 0.759 | 0.999534704 |
| 382 | ENSG00000174469 | 0.00154757  | 0.76  | 0.999534704 |
| 383 | ENSG00000103226 | 0.000823909 | 0.762 | 0.999534704 |
| 384 | ENSG00000038382 | 0.000971839 | 0.764 | 0.999534704 |
| 385 | ENSG00000136068 | 0.00154757  | 0.768 | 0.999534704 |
| 386 | ENSG00000113712 | 0.000971839 | 0.769 | 0.999534704 |
| 387 | ENSG00000137210 | 0.000909932 | 0.771 | 0.999534704 |
| 388 | ENSG00000163510 | 0.00154757  | 0.772 | 0.999534704 |
| 389 | ENSG00000133226 | 0.000777806 | 0.773 | 0.999534704 |
| 390 | ENSG00000164796 | 0.000971839 | 0.792 | 1           |
| 391 | ENSG00000115464 | 0.00079997  | 0.82  | 1           |
| 392 | ENSG00000138592 | 0.0005947   | 0.876 | 1           |
| 393 | ENSG00000155657 | 0.000504163 | 0.877 | 1           |
| 394 | ENSG00000204304 | 0.00095174  | 0.879 | 1           |
| 395 | ENSG00000174373 | 0.0005947   | 0.881 | 1           |
| 396 | ENSG00000170074 | 0.000508231 | 0.881 | 1           |
| 397 | ENSG00000153107 | 0.000651547 | 0.884 | 1           |
| 398 | ENSG00000196367 | 0.00095174  | 0.891 | 1           |
| 399 | ENSG00000112414 | 0.00095174  | 0.91  | 1           |
| 400 | ENSG00000083635 | 0.000422222 | 0.913 | 1           |
| 401 | ENSG00000147065 | 0.000637404 | 0.934 | 1           |
| 402 | ENSG00000001629 | 0.001102653 | 1     | 1           |

|     |                 |             |   |   |
|-----|-----------------|-------------|---|---|
| 403 | ENSG00000004897 | 0.001102653 | 1 | 1 |
| 404 | ENSG00000007402 | 0.001102653 | 1 | 1 |
| 405 | ENSG00000008405 | 0.001102653 | 1 | 1 |
| 406 | ENSG00000029534 | 0.001102653 | 1 | 1 |
| 407 | ENSG00000039139 | 0.001102653 | 1 | 1 |
| 408 | ENSG00000058262 | 0.001102653 | 1 | 1 |
| 409 | ENSG00000065809 | 0.001102653 | 1 | 1 |
| 410 | ENSG00000069248 | 0.001102653 | 1 | 1 |
| 411 | ENSG00000077097 | 0.001102653 | 1 | 1 |
| 412 | ENSG00000081237 | 0.001102653 | 1 | 1 |
| 413 | ENSG00000081479 | 0.001102653 | 1 | 1 |
| 414 | ENSG00000083312 | 0.001102653 | 1 | 1 |
| 415 | ENSG00000084774 | 0.001102653 | 1 | 1 |
| 416 | ENSG00000088280 | 0.001102653 | 1 | 1 |
| 417 | ENSG00000099977 | 0.001102653 | 1 | 1 |
| 418 | ENSG00000100075 | 0.001102653 | 1 | 1 |
| 419 | ENSG00000102078 | 0.001102653 | 1 | 1 |
| 420 | ENSG00000105193 | 0.001102653 | 1 | 1 |
| 421 | ENSG00000106028 | 0.001102653 | 1 | 1 |
| 422 | ENSG00000108518 | 0.001102653 | 1 | 1 |
| 423 | ENSG00000111300 | 0.001102653 | 1 | 1 |
| 424 | ENSG00000111752 | 0.001102653 | 1 | 1 |
| 425 | ENSG00000112159 | 0.001102653 | 1 | 1 |
| 426 | ENSG00000112200 | 0.001102653 | 1 | 1 |
| 427 | ENSG00000117758 | 0.001102653 | 1 | 1 |
| 428 | ENSG00000118454 | 0.001102653 | 1 | 1 |
| 429 | ENSG00000118816 | 0.001102653 | 1 | 1 |
| 430 | ENSG00000121289 | 0.001102653 | 1 | 1 |
| 431 | ENSG00000121570 | 0.001102653 | 1 | 1 |
| 432 | ENSG00000121671 | 0.001102653 | 1 | 1 |
| 433 | ENSG00000122707 | 0.001102653 | 1 | 1 |
| 434 | ENSG00000124702 | 0.001102653 | 1 | 1 |
| 435 | ENSG00000124920 | 0.001102653 | 1 | 1 |
| 436 | ENSG00000125445 | 0.001102653 | 1 | 1 |
| 437 | ENSG00000125459 | 0.001102653 | 1 | 1 |
| 438 | ENSG00000125952 | 0.001102653 | 1 | 1 |
| 439 | ENSG00000128641 | 0.001102653 | 1 | 1 |
| 440 | ENSG00000129566 | 0.001102653 | 1 | 1 |
| 441 | ENSG00000129675 | 0.001102653 | 1 | 1 |
| 442 | ENSG00000132122 | 0.001102653 | 1 | 1 |
| 443 | ENSG00000132522 | 0.001102653 | 1 | 1 |

|     |                 |             |   |   |
|-----|-----------------|-------------|---|---|
| 444 | ENSG00000132676 | 0.001102653 | 1 | 1 |
| 445 | ENSG00000132819 | 0.001102653 | 1 | 1 |
| 446 | ENSG00000134109 | 0.001102653 | 1 | 1 |
| 447 | ENSG00000134627 | 0.001102653 | 1 | 1 |
| 448 | ENSG00000135596 | 0.001102653 | 1 | 1 |
| 449 | ENSG00000136011 | 0.001102653 | 1 | 1 |
| 450 | ENSG00000136104 | 0.001102653 | 1 | 1 |
| 451 | ENSG00000137700 | 0.001102653 | 1 | 1 |
| 452 | ENSG00000138448 | 0.001102653 | 1 | 1 |
| 453 | ENSG00000138778 | 0.001102653 | 1 | 1 |
| 454 | ENSG00000140853 | 0.001102653 | 1 | 1 |
| 455 | ENSG00000140905 | 0.001102653 | 1 | 1 |
| 456 | ENSG00000143452 | 0.001102653 | 1 | 1 |
| 457 | ENSG00000145741 | 0.001102653 | 1 | 1 |
| 458 | ENSG00000148356 | 0.001102653 | 1 | 1 |
| 459 | ENSG00000149547 | 0.001102653 | 1 | 1 |
| 460 | ENSG00000150527 | 0.001102653 | 1 | 1 |
| 461 | ENSG00000150787 | 0.001102653 | 1 | 1 |
| 462 | ENSG00000151422 | 0.001102653 | 1 | 1 |
| 463 | ENSG00000151779 | 0.001102653 | 1 | 1 |
| 464 | ENSG00000152601 | 0.001102653 | 1 | 1 |
| 465 | ENSG00000154265 | 0.001102653 | 1 | 1 |
| 466 | ENSG00000160188 | 0.001102653 | 1 | 1 |
| 467 | ENSG00000160211 | 0.001102653 | 1 | 1 |
| 468 | ENSG00000162869 | 0.001102653 | 1 | 1 |
| 469 | ENSG00000164190 | 0.001102653 | 1 | 1 |
| 470 | ENSG00000165390 | 0.001102653 | 1 | 1 |
| 471 | ENSG00000165912 | 0.001102653 | 1 | 1 |
| 472 | ENSG00000167548 | 0.001102653 | 1 | 1 |
| 473 | ENSG00000168778 | 0.001102653 | 1 | 1 |
| 474 | ENSG00000171132 | 0.001102653 | 1 | 1 |
| 475 | ENSG00000172115 | 0.001102653 | 1 | 1 |
| 476 | ENSG00000175582 | 0.001102653 | 1 | 1 |
| 477 | ENSG00000176783 | 0.001102653 | 1 | 1 |
| 478 | ENSG00000177156 | 0.001102653 | 1 | 1 |
| 479 | ENSG00000182095 | 0.001102653 | 1 | 1 |
| 480 | ENSG00000182621 | 0.001102653 | 1 | 1 |
| 481 | ENSG00000183765 | 0.001102653 | 1 | 1 |
| 482 | ENSG00000186439 | 0.001102653 | 1 | 1 |
| 483 | ENSG00000187240 | 0.001102653 | 1 | 1 |
| 484 | ENSG00000187522 | 0.001102653 | 1 | 1 |

|     |                 |             |   |   |
|-----|-----------------|-------------|---|---|
| 485 | ENSG00000197121 | 0.001102653 | 1 | 1 |
| 486 | ENSG00000197386 | 0.001102653 | 1 | 1 |
| 487 | ENSG00000197893 | 0.001102653 | 1 | 1 |
| 488 | ENSG00000197969 | 0.001102653 | 1 | 1 |
| 489 | ENSG00000198355 | 0.001102653 | 1 | 1 |
| 490 | ENSG00000198382 | 0.001102653 | 1 | 1 |
| 491 | ENSG00000205038 | 0.001102653 | 1 | 1 |
| 492 | ENSG00000211460 | 0.001102653 | 1 | 1 |
| 493 | ENSG00000227345 | 0.001102653 | 1 | 1 |
| 494 | ENSG00000241186 | 0.001102653 | 1 | 1 |
| 495 | ENSG00000253729 | 0.001102653 | 1 | 1 |
| 496 | ENSG00000254999 | 0.001102653 | 1 | 1 |
| 497 | ENSG00000258941 | 0.001102653 | 1 | 1 |
| 498 | ENSG00000261915 | 0.001102653 | 1 | 1 |
| 499 | ENSG00000264424 | 0.001102653 | 1 | 1 |
| 500 | ENSG00000104517 | 0.000930534 | 1 | 1 |
| 501 | ENSG00000113721 | 0.000930534 | 1 | 1 |
| 502 | ENSG00000157106 | 0.000930534 | 1 | 1 |
| 503 | ENSG00000127481 | 0.000283085 | 1 | 1 |



**Table C. Percentage of total variants (retroduplications, or SNPs) private to each superpopulation.** The novel retroduplication set can be found in S2 File. The SNPs were extracted from the 1000 Genomes Project Phase 3 dataset (Auton et al., 2015), available at [ftp://ftp.1000genomes.ebi.ac.uk/vol1/ftp/release/20130502/ALL.wgs.phase3\\_shapeit2\\_mvncall\\_integrated\\_v5b.20130502.sites.vcf.gz](ftp://ftp.1000genomes.ebi.ac.uk/vol1/ftp/release/20130502/ALL.wgs.phase3_shapeit2_mvncall_integrated_v5b.20130502.sites.vcf.gz).

|                   | <b>Total variant sites detected in all genomes</b> | <b>Total variant sites private to a superpopulation</b> | <b>AFR</b>            | <b>AMR</b>          | <b>EAS</b>            | <b>EUR</b>          | <b>SAS</b>            |
|-------------------|----------------------------------------------------|---------------------------------------------------------|-----------------------|---------------------|-----------------------|---------------------|-----------------------|
| Retroduplications | 503                                                | 397<br>(78.9%)                                          | 119<br>(23.7%)        | 39<br>(7.8%)        | 80<br>(15.9%)         | 65<br>(12.9%)       | 94<br>(18.7%)         |
| SNPs              | 81,443,073                                         | 55,983,609<br>(68.7%)                                   | 20,120,050<br>(24.7%) | 5,577,247<br>(6.8%) | 11,742,915<br>(14.4%) | 7,189,248<br>(8.8%) | 11,354,149<br>(13.9%) |

**Table D. Disease-associated retroduplication insertions.** These insertion target (inserted) genes associated with diseases are supported by literature, mined from the DISEASES database.

| Insertion site chr. | Insertion site start | Insertion site end | Parent gene name | Parent gene Ensembl ID | Parent gene chr. | Parent gene start | Parent gene end | Affected population (by insertion points) | Inserted gene name | Ref         | Disease, evidence                                   |
|---------------------|----------------------|--------------------|------------------|------------------------|------------------|-------------------|-----------------|-------------------------------------------|--------------------|-------------|-----------------------------------------------------|
| chr19               | 13331914             | 13332160           | ANK1             | ENSG00000029534        | chr8             | 41510738          | 41754280        | LWK                                       | CACNA1A            | DOI:0060178 | Familial,hemiplegic,migraine,GHR,CURATED            |
|                     |                      |                    |                  |                        |                  |                   |                 |                                           | CACNA1A            | DOI:1289    | Neurodegenerative,disease,UniProtKB-KW,CURATED      |
|                     |                      |                    |                  |                        |                  |                   |                 |                                           | CACNA1A            | DOI:1441    | Spinocerebellar,ataxia,UniProtKB-KW,CURATED         |
|                     |                      |                    |                  |                        |                  |                   |                 |                                           | CACNA1A            | DOI:963     | Episodic,ataxia,GHR,CURATED                         |
| chr3                | 8868980              | 8869077            | SLMO2            | ENSG00000101166        | chr20            | 57608199          | 57617964        | ACB,ESN,GWD,YRI                           | CAV3               | DOI:0050700 | Cardiomyopathy,UniProtKB-KW,CURATED,                |
|                     |                      |                    |                  |                        |                  |                   |                 |                                           | CAV3               | DOI:11724   | limb-girdle,muscular,dystrophy,GHR,CURATED          |
|                     |                      |                    |                  |                        |                  |                   |                 |                                           | CAV3               | DOI:11724   | limb-girdle,muscular,dystrophy,UniProtKB-KW,CURATED |
|                     |                      |                    |                  |                        |                  |                   |                 |                                           | CAV3               | DOI:2843    | Long,QT,syndrome,UniProtKB-KW,CURATED               |
| chr8                | 68377448             | 68377749           | TP11             | ENSG00000111669        | chr12            | 6976282           | 6980112         | GIH                                       | CPA6               | DOI:1826    | Epilepsy,syndrome,UniProtKB-KW,CURATED              |
| chr2                | 116376651            | 116376659          | SET              | ENSG00000119335        | chr9             | 131445702         | 131458679       | CEU,FIN,IBS,LWK                           | DPP10              | DOI:2841    | Asthma,UniProtKB-KW,CURATED,                        |
| chr15               | 67871200             | 67871563           | COX7C            | ENSG00000127184        | chr5             | 85913720          | 85916779        | CHS                                       | MAP2K5             | DOI:0050425 | Restless,legs,syndrome,GHR,CURATED                  |
| chr10               | 30651932             | 30652023           | ITSN2            | ENSG00000198399        | chr2             | 24425732          | 24583583        | CEU                                       | MTPAP              | DOI:1289    | Neurodegenerative,disease,UniProtKB-KW,CURATED      |
| chr5                | 149311980            | 149312306          | MFF              | ENSG00000168958        | chr2             | 228189866         | 228222550       | YRI                                       | PDE6A              | DOI:10584   | Retinitis,pigmentosa,GHR,CURATED                    |
|                     |                      |                    |                  |                        |                  |                   |                 |                                           | PDE6A              | DOI:10584   | Retinitis,pigmentosa,UniProtKB-KW,CURATED           |
| chr6                | 167114767            | 167114812          | IGF2BP3          | ENSG00000136231        | chr7             | 23349827          | 23510086        | BEB,CLM,GWD,JPT,YRI                       | RPS6KA2            | DOI:162     | Cancer,UniProtKB-KW,CURATED,                        |
| chr6                | 167114167            | 167114249          | IGF2BP3          | ENSG00000136231        | chr7             | 23349827          | 23510086        | CHB,ESN,IBS,LWK,MSL,PUR,YRI               |                    |             | ''''                                                |
| chr6                | 167113886            | 167113963          | IGF2BP3          | ENSG00000136231        | chr7             | 23349827          | 23510086        | PJL                                       |                    |             | ''''                                                |
| chr13               | 36934280             | 36934427           | RALGAPA1         | ENSG00000174373        | chr14            | 36007557          | 36278510        | ASW,IBS                                   | SPG20              | DOI:1289    | Neurodegenerative,disease,UniProtKB-KW,CURATED      |
|                     |                      |                    |                  |                        |                  |                   |                 |                                           | SPG20              | DOI:2476    | Hereditary,spastic,paraplegia,UniProtKB-KW,CURATED  |
| chrX                | 41032571             | 41032679           | PFN1             | ENSG00000108518        | chr17            | 4848946           | 4852356         | GWD                                       | USP9X              | DOI:1059    | Intellectual,disability,UniProtKB-KW,CURATED        |

**Table E. Exon-exon junction calls from two trios.** Comparison of the number of calls from different platforms.

|                   | CEU trio                                      | YRI trio |
|-------------------|-----------------------------------------------|----------|
| High-coverage WGS | 13                                            | 11       |
| High-coverage WES | 11                                            | 7        |
| Shallow WGS       | 6 (NA12878 only, parents' data not available) | 5        |

**Estimation of FDR in real data:**

Our method could take advantage of the high-coverage WES. In the previous study (Abyzov et al. 2013), retroduplications were discovered per population (i.e. all the individuals in the same population were pooled), since the coverage of Phase 1 WGS data was shallow. By analyzing the pooled shallow WGS data, there was less than 1 novel retroduplication discovered per individual. In comparison, here in this study, we identified novel retroduplications individually using high-coverage WES data, and the number of detected novel retroduplications per individual (median: 6) is significantly more than in the previous study.

Besides, Abyzov et al. also called retroduplications in two deep sequenced trios. These retroduplications have been verified both computationally and experimentally in Abyzov et al. In the CEU and YRI trios, they identified 13 and 11 novel retroduplications, respectively. The numbers are comparable to what we found in our study (median: 6 per individual). We would expect the sensitivity of our WES-based method lie between low-coverage and high-coverage WGS-based method. Indeed, we identified 11 and 7 unique retroduplications in CEU and YRI trios, which are slightly less than 13 and 11.

Furthermore, among the 6 retroduplications that we identified by exon-exon junction strategy on high-coverage WES in the CEU child (NA12878), 4 of them (SKA3, TDG, CBX3 and AP3S1) were also identified by Abyzov et al. using high-coverage WGS data but not AK2 and HNRNPC. In the YRI trio, 5/7 overlapped with the set reported by Abyzov et al. (overlapped: TMEM5, CBX3, ATP9B, MFF and AP3S1, not overlapped: PABPC1 and AK2)." But AK2 and PABPC1 are in the common retroduplication set that Abyzov et al. reported. Taken all together, our estimation of FDR using a validated, independent set is 7.7% (1/13). Noticeably, this is likely an underestimated as some of our unique retroduplications might be missed in Abyzov et al.
