# Supplementary material for: Landscape and variation of novel retroduplications in 26 human populations
Source: PLoS Comput Biol. 2017 Jun 29;13(6):e1005567. doi: 10.1371/journal.pcbi.1005567 (PMC5510864; doi:10.1371/journal.pcbi.1005567)
Supplement: S5 Text — The file contains the retroduplication counts (in terms of the number of individuals having the retroduplication in a superpopulation), and the retroduplication frequencies, for all the 503 unique parent genes detected in the whole callset. (XLSX) [file pcbi.1005567.s005.xlsx]

## Sheet: 1-Retroduplication count
	AFR	AMR	EAS	EUR	SAS
ENSG00000001629	1	0	0	0	0
ENSG00000003402	0	0	0	0	1
ENSG00000004455	366	200	378	315	239
ENSG00000004866	0	1	0	0	0
ENSG00000004897	1	0	0	0	0
ENSG00000005810	0	0	0	1	2
ENSG00000007392	0	0	0	0	1
ENSG00000007402	1	0	0	0	0
ENSG00000008128	0	0	1	0	0
ENSG00000008405	1	0	0	0	0
ENSG00000011566	3	0	0	0	0
ENSG00000015479	2	8	0	30	24
ENSG00000015568	0	1	1	0	0
ENSG00000023228	0	0	1	0	0
ENSG00000025156	0	1	0	0	0
ENSG00000029363	2	0	0	0	0
ENSG00000029534	1	0	0	0	0
ENSG00000035141	0	0	1	0	0
ENSG00000038382	1	0	0	0	1
ENSG00000039139	1	0	0	0	0
ENSG00000042317	0	0	1	0	0
ENSG00000042781	0	0	0	1	0
ENSG00000047457	0	0	1	0	0
ENSG00000048028	23	0	0	0	1
ENSG00000048544	0	0	0	0	1
ENSG00000049759	0	0	0	0	1
ENSG00000052723	0	0	13	0	0
ENSG00000053108	0	0	0	1	0
ENSG00000054523	0	0	0	0	1
ENSG00000056097	0	0	0	1	0
ENSG00000058262	1	0	0	0	0
ENSG00000060718	0	0	1	0	0
ENSG00000064666	0	0	0	0	1
ENSG00000065361	0	0	0	2	1
ENSG00000065809	1	0	0	0	0
ENSG00000066027	0	1	0	0	0
ENSG00000066813	0	0	0	1	0
ENSG00000066933	0	0	1	0	0
ENSG00000068878	0	0	1	0	0
ENSG00000069248	1	0	0	0	0
ENSG00000070756	631	291	483	433	455
ENSG00000071082	10	1	0	0	0
ENSG00000072818	0	0	0	0	1
ENSG00000074219	0	0	0	0	1
ENSG00000075624	0	0	0	2	0
ENSG00000077097	1	0	0	0	0
ENSG00000077380	0	0	0	0	1
ENSG00000077522	0	0	0	0	1
ENSG00000077809	0	0	0	0	2
ENSG00000078114	0	0	1	0	0
ENSG00000078304	0	1	0	0	0
ENSG00000079805	0	0	0	0	1
ENSG00000079974	0	1	1	0	0
ENSG00000081026	0	0	0	0	1
ENSG00000081237	1	0	0	0	0
ENSG00000081479	1	0	0	0	0
ENSG00000082516	0	0	0	0	1
ENSG00000083290	0	0	0	1	0
ENSG00000083312	1	0	0	0	0
ENSG00000083635	3	2	3	1	2
ENSG00000083857	0	0	0	1	0
ENSG00000084774	1	0	0	0	0
ENSG00000085788	0	0	0	0	1
ENSG00000086475	2	0	0	0	0
ENSG00000086758	0	0	0	1	0
ENSG00000087053	0	1	0	14	0
ENSG00000088256	20	4	1	1	21
ENSG00000088280	1	0	0	0	0
ENSG00000089157	0	1	0	0	0
ENSG00000089472	0	0	0	0	1
ENSG00000090054	9	0	0	0	0
ENSG00000090402	0	0	1	0	0
ENSG00000092199	30	2	4	21	21
ENSG00000092445	103	115	27	245	69
ENSG00000096063	0	0	1	0	0
ENSG00000099821	4	3	11	5	1
ENSG00000099977	1	0	0	0	0
ENSG00000100030	0	1	0	0	0
ENSG00000100075	1	0	0	0	0
ENSG00000100083	0	0	0	0	1
ENSG00000100316	0	0	1	0	0
ENSG00000100802	0	0	0	0	5
ENSG00000101132	0	0	0	0	1
ENSG00000101166	30	1	0	0	0
ENSG00000101220	1	2	0	1	2
ENSG00000101266	4	4	11	7	3
ENSG00000101367	0	0	0	0	1
ENSG00000101444	0	0	0	0	5
ENSG00000102078	1	0	0	0	0
ENSG00000102317	0	0	9	0	1
ENSG00000102978	18	2	0	0	0
ENSG00000103226	3	3	2	3	1
ENSG00000103495	0	0	0	1	0
ENSG00000103657	0	0	0	1	0
ENSG00000104341	0	13	0	20	10
ENSG00000104408	6	0	0	0	0
ENSG00000104413	0	0	1	0	0
ENSG00000104517	1	0	1	0	0
ENSG00000104613	0	0	1	0	0
ENSG00000105193	1	0	0	0	0
ENSG00000105835	0	0	1	0	1
ENSG00000106028	1	0	0	0	0
ENSG00000106636	0	1	0	0	0
ENSG00000107438	0	0	0	2	3
ENSG00000107779	0	0	2	0	1
ENSG00000108518	1	0	0	0	0
ENSG00000109270	0	0	0	0	1
ENSG00000110200	0	0	1	0	0
ENSG00000110700	0	0	0	0	1
ENSG00000111247	0	0	0	1	0
ENSG00000111300	1	0	0	0	0
ENSG00000111615	0	7	11	0	0
ENSG00000111640	2	42	55	0	70
ENSG00000111669	0	0	0	2	1
ENSG00000111670	11	1	0	0	0
ENSG00000111752	1	0	0	0	0
ENSG00000112159	1	0	0	0	0
ENSG00000112200	1	0	0	0	0
ENSG00000112282	0	0	0	1	0
ENSG00000112379	0	0	0	0	1
ENSG00000112414	1	0	0	1	0
ENSG00000112706	0	0	0	1	0
ENSG00000112787	2	3	0	7	0
ENSG00000113013	0	1	0	0	0
ENSG00000113712	1	0	0	0	1
ENSG00000113721	1	0	1	0	0
ENSG00000114416	0	0	5	0	0
ENSG00000114857	0	0	0	1	0
ENSG00000114867	0	0	0	0	1
ENSG00000115464	0	0	1	1	1
ENSG00000115539	3	50	25	28	17
ENSG00000115541	2	0	0	1	1
ENSG00000115760	0	0	0	0	1
ENSG00000115839	0	0	0	1	0
ENSG00000116001	0	1	0	0	0
ENSG00000116251	1	1	6	4	0
ENSG00000116489	1	0	0	0	2
ENSG00000116497	0	0	0	0	1
ENSG00000116678	0	0	0	1	0
ENSG00000116748	0	0	0	0	1
ENSG00000116809	0	0	0	0	1
ENSG00000117245	0	0	0	1	0
ENSG00000117758	1	0	0	0	0
ENSG00000118113	0	1	0	0	0
ENSG00000118307	0	0	0	0	1
ENSG00000118454	1	0	0	0	0
ENSG00000118564	99	2	0	0	0
ENSG00000118600	7	0	0	0	0
ENSG00000118816	1	0	0	0	0
ENSG00000118965	0	0	0	1	0
ENSG00000118997	0	0	1	0	0
ENSG00000119335	1	0	0	2	0
ENSG00000119685	0	0	0	1	0
ENSG00000120137	0	2	1	0	1
ENSG00000120438	6	0	0	0	0
ENSG00000120658	0	0	0	0	1
ENSG00000121289	1	0	0	0	0
ENSG00000121570	1	0	0	0	0
ENSG00000121579	5	0	0	0	0
ENSG00000121671	1	0	0	0	0
ENSG00000121741	0	0	1	0	0
ENSG00000122008	0	0	1	0	0
ENSG00000122512	0	0	0	1	0
ENSG00000122565	454	282	454	373	352
ENSG00000122643	0	0	0	0	1
ENSG00000122707	1	0	0	0	0
ENSG00000122966	0	0	1	0	0
ENSG00000123104	2	0	1	0	0
ENSG00000123505	0	0	0	0	1
ENSG00000123545	0	1	0	0	0
ENSG00000124562	9	0	0	0	0
ENSG00000124702	1	0	0	0	0
ENSG00000124721	0	0	1	0	0
ENSG00000124789	0	0	1	0	0
ENSG00000124920	1	0	0	0	0
ENSG00000125144	0	1	0	0	0
ENSG00000125445	1	0	0	0	0
ENSG00000125459	1	0	0	0	0
ENSG00000125952	1	0	0	0	0
ENSG00000126787	0	0	1	0	0
ENSG00000127184	0	0	1	0	0
ENSG00000127481	1	0	1	1	1
ENSG00000127980	0	0	1	0	0
ENSG00000128585	0	0	1	0	0
ENSG00000128641	1	0	0	0	0
ENSG00000128699	0	0	1	0	0
ENSG00000128731	1	2	0	1	0
ENSG00000129566	1	0	0	0	0
ENSG00000129675	1	0	0	0	0
ENSG00000130024	0	1	0	1	0
ENSG00000130158	1	1	0	0	0
ENSG00000130159	0	1	0	0	0
ENSG00000130255	0	3	0	9	0
ENSG00000131018	0	0	0	1	1
ENSG00000131732	0	1	0	0	0
ENSG00000132122	1	0	0	0	0
ENSG00000132522	1	0	0	0	0
ENSG00000132570	0	0	0	1	0
ENSG00000132603	5	1	0	0	0
ENSG00000132676	1	0	0	0	0
ENSG00000132692	0	1	0	0	0
ENSG00000132694	0	0	0	0	1
ENSG00000132819	1	0	0	0	0
ENSG00000133056	0	0	0	0	1
ENSG00000133112	0	0	0	0	1
ENSG00000133226	3	2	2	5	3
ENSG00000133818	0	1	0	0	0
ENSG00000133872	0	5	0	23	10
ENSG00000133962	0	0	0	0	1
ENSG00000134109	1	0	0	0	0
ENSG00000134222	0	0	0	0	5
ENSG00000134250	0	1	1	0	0
ENSG00000134287	0	0	1	0	0
ENSG00000134333	0	0	0	0	1
ENSG00000134453	0	0	0	1	0
ENSG00000134627	1	0	0	0	0
ENSG00000134970	0	0	1	0	0
ENSG00000135457	0	1	0	0	0
ENSG00000135596	1	0	0	0	0
ENSG00000135837	0	0	0	0	1
ENSG00000135976	0	0	0	1	0
ENSG00000136011	1	0	0	0	0
ENSG00000136068	0	0	1	0	0
ENSG00000136104	1	0	0	0	0
ENSG00000136144	3	0	0	0	0
ENSG00000136231	20	7	31	15	15
ENSG00000136810	0	0	1	0	0
ENSG00000136888	0	0	0	1	0
ENSG00000136895	0	0	0	0	1
ENSG00000137210	1	1	1	0	0
ENSG00000137312	0	0	1	0	0
ENSG00000137414	15	32	25	29	20
ENSG00000137492	0	1	4	2	0
ENSG00000137601	0	1	0	0	0
ENSG00000137700	1	0	0	0	0
ENSG00000137714	0	0	0	0	1
ENSG00000138448	1	0	0	0	0
ENSG00000138592	2	1	0	1	1
ENSG00000138688	0	0	1	0	0
ENSG00000138778	1	0	0	0	0
ENSG00000138792	0	0	0	0	1
ENSG00000139144	0	0	0	0	1
ENSG00000139218	0	0	0	1	0
ENSG00000139372	518	240	447	350	341
ENSG00000139579	0	0	1	0	0
ENSG00000140157	0	0	1	0	0
ENSG00000140319	0	0	1	0	0
ENSG00000140853	1	0	0	0	0
ENSG00000140905	1	0	0	0	0
ENSG00000140992	0	0	0	1	0
ENSG00000141552	0	0	1	0	0
ENSG00000141568	0	0	10	0	0
ENSG00000141646	0	0	0	2	0
ENSG00000142609	0	0	0	0	1
ENSG00000143207	0	0	0	1	0
ENSG00000143252	0	0	1	1	0
ENSG00000143341	0	1	0	0	0
ENSG00000143436	0	0	0	0	1
ENSG00000143452	1	0	0	0	0
ENSG00000143494	0	0	0	0	2
ENSG00000143515	0	0	0	0	1
ENSG00000143543	0	0	1	0	0
ENSG00000143702	0	0	0	1	0
ENSG00000144381	0	0	0	1	1
ENSG00000144821	0	0	0	1	1
ENSG00000145147	0	0	0	0	1
ENSG00000145216	0	0	0	0	1
ENSG00000145592	0	0	1	0	0
ENSG00000145730	0	1	0	0	0
ENSG00000145741	1	0	0	0	0
ENSG00000145860	15	2	22	16	17
ENSG00000146350	0	0	1	0	0
ENSG00000146574	0	0	1	0	0
ENSG00000146776	0	1	0	0	0
ENSG00000147050	0	0	0	1	0
ENSG00000147065	1	0	1	0	1
ENSG00000147274	3	0	0	1	0
ENSG00000147403	0	0	1	0	0
ENSG00000147679	0	0	1	0	0
ENSG00000148356	1	0	0	0	0
ENSG00000148408	12	7	9	17	9
ENSG00000149100	12	0	0	0	0
ENSG00000149273	0	0	2	0	0
ENSG00000149311	0	0	0	1	0
ENSG00000149357	0	0	0	1	9
ENSG00000149531	15	6	1	22	50
ENSG00000149547	1	0	0	0	0
ENSG00000150093	0	1	0	0	1
ENSG00000150459	0	0	0	1	0
ENSG00000150527	1	0	0	0	0
ENSG00000150760	0	0	0	0	1
ENSG00000150787	1	0	0	0	0
ENSG00000151067	0	0	1	0	0
ENSG00000151422	1	0	0	0	0
ENSG00000151779	1	0	0	0	0
ENSG00000151914	0	0	1	0	1
ENSG00000152208	0	0	0	0	1
ENSG00000152348	0	0	0	1	0
ENSG00000152484	0	0	1	0	0
ENSG00000152558	0	0	0	1	0
ENSG00000152601	1	0	0	0	0
ENSG00000152818	0	0	1	0	0
ENSG00000153107	1	0	0	1	1
ENSG00000153201	0	0	0	1	0
ENSG00000153207	2	0	1	0	0
ENSG00000153391	0	0	2	0	0
ENSG00000153956	0	1	0	0	0
ENSG00000154059	0	0	0	1	0
ENSG00000154263	2	0	0	0	0
ENSG00000154265	1	0	0	0	0
ENSG00000154447	0	0	0	1	0
ENSG00000155313	0	1	0	0	0
ENSG00000155438	5	0	0	0	0
ENSG00000155561	0	0	0	1	0
ENSG00000155657	4	2	1	2	2
ENSG00000155744	0	0	0	0	2
ENSG00000156374	0	0	1	0	0
ENSG00000156467	0	2	0	0	0
ENSG00000156795	0	0	0	2	0
ENSG00000156802	0	0	0	1	0
ENSG00000157106	1	0	1	0	0
ENSG00000157350	0	0	0	1	0
ENSG00000157388	0	0	0	1	0
ENSG00000157423	1	0	0	0	2
ENSG00000157483	0	0	0	0	1
ENSG00000157856	0	0	0	0	1
ENSG00000158321	0	0	1	0	0
ENSG00000160075	0	0	1	0	0
ENSG00000160188	1	0	0	0	0
ENSG00000160211	1	0	0	0	0
ENSG00000160877	0	0	4	0	0
ENSG00000161203	0	0	0	0	1
ENSG00000162869	1	0	0	0	0
ENSG00000162927	0	0	0	1	0
ENSG00000163029	0	0	0	0	1
ENSG00000163312	0	0	0	0	1
ENSG00000163319	0	0	0	0	3
ENSG00000163389	0	0	0	0	1
ENSG00000163467	5	0	0	0	0
ENSG00000163492	0	1	0	0	0
ENSG00000163510	0	0	1	0	0
ENSG00000163539	0	0	1	0	0
ENSG00000163554	0	0	1	0	0
ENSG00000163605	0	0	1	0	0
ENSG00000163638	0	0	0	0	1
ENSG00000163754	0	0	1	0	0
ENSG00000163877	0	1	0	0	0
ENSG00000164032	0	1	0	0	0
ENSG00000164118	0	0	1	0	0
ENSG00000164190	1	0	0	0	0
ENSG00000164253	0	1	0	0	0
ENSG00000164796	1	0	0	0	1
ENSG00000165084	0	0	0	1	0
ENSG00000165181	0	0	0	1	0
ENSG00000165390	1	0	0	0	0
ENSG00000165480	46	99	254	144	215
ENSG00000165521	0	0	0	0	1
ENSG00000165732	0	0	1	0	0
ENSG00000165898	0	1	0	0	0
ENSG00000165899	0	0	0	1	0
ENSG00000165912	1	0	0	0	0
ENSG00000165995	0	0	0	0	1
ENSG00000166377	50	4	0	0	0
ENSG00000166454	3	0	0	0	0
ENSG00000166743	0	0	0	0	1
ENSG00000166747	0	0	0	1	0
ENSG00000167004	0	0	2	0	0
ENSG00000167460	0	0	1	0	0
ENSG00000167548	1	0	0	0	0
ENSG00000167721	0	0	1	0	0
ENSG00000168028	0	0	0	1	0
ENSG00000168214	6	6	12	10	9
ENSG00000168614	3	3	2	2	0
ENSG00000168702	0	0	0	1	1
ENSG00000168778	1	0	0	0	0
ENSG00000168958	293	42	21	60	103
ENSG00000169062	0	0	0	0	3
ENSG00000169139	0	1	0	0	0
ENSG00000169246	1	2	2	2	4
ENSG00000169499	0	0	0	1	0
ENSG00000170074	1	1	0	1	1
ENSG00000170144	0	0	2	0	0
ENSG00000170160	0	0	1	0	0
ENSG00000170242	0	0	0	1	0
ENSG00000170906	0	1	0	0	0
ENSG00000171055	3	0	0	0	0
ENSG00000171132	1	0	0	0	0
ENSG00000171204	80	7	1	0	0
ENSG00000171314	0	0	0	1	0
ENSG00000171502	0	0	0	0	1
ENSG00000172115	1	0	0	0	0
ENSG00000173674	3	1	0	0	0
ENSG00000173812	0	0	0	0	1
ENSG00000173915	3	0	0	0	0
ENSG00000174093	0	0	0	0	1
ENSG00000174373	2	1	0	1	1
ENSG00000174469	0	0	1	0	0
ENSG00000174799	0	0	0	1	0
ENSG00000174827	0	0	0	0	1
ENSG00000175387	0	0	1	0	0
ENSG00000175582	1	0	0	0	0
ENSG00000176783	1	0	0	0	0
ENSG00000176853	0	0	0	1	1
ENSG00000176915	0	0	0	0	3
ENSG00000177156	1	0	0	0	0
ENSG00000177200	0	1	0	1	0
ENSG00000177600	0	0	0	1	0
ENSG00000177879	651	323	491	490	469
ENSG00000178104	2	0	0	0	0
ENSG00000178127	1	0	0	0	2
ENSG00000180228	189	220	277	253	257
ENSG00000180370	9	11	10	11	11
ENSG00000180694	0	0	1	0	0
ENSG00000180777	0	0	0	1	0
ENSG00000181163	0	0	0	0	1
ENSG00000181929	0	0	0	0	1
ENSG00000182095	1	0	0	0	0
ENSG00000182621	1	0	0	0	0
ENSG00000182899	0	0	0	0	2
ENSG00000183091	0	0	0	1	0
ENSG00000183354	0	0	0	1	0
ENSG00000183765	1	0	0	0	0
ENSG00000183914	0	0	0	0	1
ENSG00000184445	0	0	0	0	1
ENSG00000185088	0	0	0	0	1
ENSG00000185261	0	1	0	0	0
ENSG00000185305	0	1	0	0	0
ENSG00000185716	61	18	6	5	87
ENSG00000185842	0	1	0	0	0
ENSG00000185864	6	4	4	5	1
ENSG00000186275	2	0	0	1	0
ENSG00000186298	0	0	0	3	0
ENSG00000186439	1	0	0	0	0
ENSG00000186998	0	0	0	1	0
ENSG00000187240	1	0	0	0	0
ENSG00000187323	0	0	0	0	1
ENSG00000187522	1	0	0	0	0
ENSG00000187742	3	0	0	0	0
ENSG00000188219	0	0	1	0	0
ENSG00000188641	0	0	0	0	1
ENSG00000188647	0	1	0	0	0
ENSG00000188906	0	0	1	0	0
ENSG00000196367	1	0	0	1	0
ENSG00000196419	0	0	2	0	0
ENSG00000196586	0	0	0	0	1
ENSG00000196712	0	0	0	0	1
ENSG00000197006	0	0	0	1	0
ENSG00000197020	0	0	0	4	1
ENSG00000197121	1	0	0	0	0
ENSG00000197136	0	0	0	0	1
ENSG00000197386	1	0	0	0	0
ENSG00000197563	0	0	1	0	0
ENSG00000197728	0	0	0	1	0
ENSG00000197756	0	0	24	0	1
ENSG00000197893	1	0	0	0	0
ENSG00000197930	0	1	0	0	0
ENSG00000197958	0	0	1	1	0
ENSG00000197969	1	0	0	0	0
ENSG00000198355	1	0	0	0	0
ENSG00000198382	1	0	0	0	0
ENSG00000198399	0	0	0	1	0
ENSG00000198420	0	0	0	0	1
ENSG00000198554	0	1	0	0	0
ENSG00000198586	0	0	0	0	1
ENSG00000198626	0	0	0	1	0
ENSG00000198648	0	0	0	0	1
ENSG00000198848	0	0	0	0	1
ENSG00000198947	0	0	0	0	2
ENSG00000203667	1	0	3	0	0
ENSG00000203943	0	1	0	0	0
ENSG00000204262	0	1	0	0	0
ENSG00000204304	1	0	0	1	0
ENSG00000204308	2	0	0	0	0
ENSG00000204628	0	0	0	0	2
ENSG00000204790	0	0	2	0	0
ENSG00000205038	1	0	0	0	0
ENSG00000205339	1	0	3	0	1
ENSG00000205358	15	0	0	0	1
ENSG00000205359	0	0	1	0	0
ENSG00000205726	0	0	1	0	0
ENSG00000211460	1	0	0	0	0
ENSG00000213064	3	0	0	0	0
ENSG00000213585	0	0	0	0	1
ENSG00000213741	0	0	0	0	1
ENSG00000213759	0	0	0	0	1
ENSG00000213995	0	0	1	0	0
ENSG00000227345	1	0	0	0	0
ENSG00000241186	1	0	0	0	0
ENSG00000241973	0	0	0	0	1
ENSG00000243414	0	0	1	0	0
ENSG00000243678	0	0	0	0	1
ENSG00000243716	0	0	0	0	1
ENSG00000251201	0	0	1	0	0
ENSG00000253729	1	0	0	0	0
ENSG00000254685	0	0	0	0	1
ENSG00000254999	1	0	0	0	0
ENSG00000257103	0	0	0	1	0
ENSG00000258941	1	0	0	0	0
ENSG00000261915	1	0	0	0	0
ENSG00000264364	0	0	0	1	0
ENSG00000264424	1	0	0	0	0
ENSG00000267699	0	0	0	2	0
ENSG00000272822	0	0	1	0	0

## Sheet: 2-Retroduplication frequency
	AFR	AMR	EAS	EUR	SAS
ENSG00000001629	0.00149701	0	0	0	0
ENSG00000003402	0	0	0	0	0.00202429
ENSG00000004455	0.547904	0.568182	0.733981	0.625	0.483806
ENSG00000004866	0	0.00284091	0	0	0
ENSG00000004897	0.00149701	0	0	0	0
ENSG00000005810	0	0	0	0.00198413	0.00404858
ENSG00000007392	0	0	0	0	0.00202429
ENSG00000007402	0.00149701	0	0	0	0
ENSG00000008128	0	0	0.00194175	0	0
ENSG00000008405	0.00149701	0	0	0	0
ENSG00000011566	0.00449102	0	0	0	0
ENSG00000015479	0.00299401	0.0227273	0	0.0595238	0.048583
ENSG00000015568	0	0.00284091	0.00194175	0	0
ENSG00000023228	0	0	0.00194175	0	0
ENSG00000025156	0	0.00284091	0	0	0
ENSG00000029363	0.00299401	0	0	0	0
ENSG00000029534	0.00149701	0	0	0	0
ENSG00000035141	0	0	0.00194175	0	0
ENSG00000038382	0.00149701	0	0	0	0.00202429
ENSG00000039139	0.00149701	0	0	0	0
ENSG00000042317	0	0	0.00194175	0	0
ENSG00000042781	0	0	0	0.00198413	0
ENSG00000047457	0	0	0.00194175	0	0
ENSG00000048028	0.0344311	0	0	0	0.00202429
ENSG00000048544	0	0	0	0	0.00202429
ENSG00000049759	0	0	0	0	0.00202429
ENSG00000052723	0	0	0.0252427	0	0
ENSG00000053108	0	0	0	0.00198413	0
ENSG00000054523	0	0	0	0	0.00202429
ENSG00000056097	0	0	0	0.00198413	0
ENSG00000058262	0.00149701	0	0	0	0
ENSG00000060718	0	0	0.00194175	0	0
ENSG00000064666	0	0	0	0	0.00202429
ENSG00000065361	0	0	0	0.00396825	0.00202429
ENSG00000065809	0.00149701	0	0	0	0
ENSG00000066027	0	0.00284091	0	0	0
ENSG00000066813	0	0	0	0.00198413	0
ENSG00000066933	0	0	0.00194175	0	0
ENSG00000068878	0	0	0.00194175	0	0
ENSG00000069248	0.00149701	0	0	0	0
ENSG00000070756	0.944611	0.826705	0.937864	0.859127	0.921053
ENSG00000071082	0.0149701	0.00284091	0	0	0
ENSG00000072818	0	0	0	0	0.00202429
ENSG00000074219	0	0	0	0	0.00202429
ENSG00000075624	0	0	0	0.00396825	0
ENSG00000077097	0.00149701	0	0	0	0
ENSG00000077380	0	0	0	0	0.00202429
ENSG00000077522	0	0	0	0	0.00202429
ENSG00000077809	0	0	0	0	0.00404858
ENSG00000078114	0	0	0.00194175	0	0
ENSG00000078304	0	0.00284091	0	0	0
ENSG00000079805	0	0	0	0	0.00202429
ENSG00000079974	0	0.00284091	0.00194175	0	0
ENSG00000081026	0	0	0	0	0.00202429
ENSG00000081237	0.00149701	0	0	0	0
ENSG00000081479	0.00149701	0	0	0	0
ENSG00000082516	0	0	0	0	0.00202429
ENSG00000083290	0	0	0	0.00198413	0
ENSG00000083312	0.00149701	0	0	0	0
ENSG00000083635	0.00449102	0.00568182	0.00582524	0.00198413	0.00404858
ENSG00000083857	0	0	0	0.00198413	0
ENSG00000084774	0.00149701	0	0	0	0
ENSG00000085788	0	0	0	0	0.00202429
ENSG00000086475	0.00299401	0	0	0	0
ENSG00000086758	0	0	0	0.00198413	0
ENSG00000087053	0	0.00284091	0	0.0277778	0
ENSG00000088256	0.0299401	0.0113636	0.00194175	0.00198413	0.0425101
ENSG00000088280	0.00149701	0	0	0	0
ENSG00000089157	0	0.00284091	0	0	0
ENSG00000089472	0	0	0	0	0.00202429
ENSG00000090054	0.0134731	0	0	0	0
ENSG00000090402	0	0	0.00194175	0	0
ENSG00000092199	0.0449102	0.00568182	0.00776699	0.0416667	0.0425101
ENSG00000092445	0.154192	0.326705	0.0524272	0.486111	0.139676
ENSG00000096063	0	0	0.00194175	0	0
ENSG00000099821	0.00598802	0.00852273	0.0213592	0.00992063	0.00202429
ENSG00000099977	0.00149701	0	0	0	0
ENSG00000100030	0	0.00284091	0	0	0
ENSG00000100075	0.00149701	0	0	0	0
ENSG00000100083	0	0	0	0	0.00202429
ENSG00000100316	0	0	0.00194175	0	0
ENSG00000100802	0	0	0	0	0.0101215
ENSG00000101132	0	0	0	0	0.00202429
ENSG00000101166	0.0449102	0.00284091	0	0	0
ENSG00000101220	0.00149701	0.00568182	0	0.00198413	0.00404858
ENSG00000101266	0.00598802	0.0113636	0.0213592	0.0138889	0.00607287
ENSG00000101367	0	0	0	0	0.00202429
ENSG00000101444	0	0	0	0	0.0101215
ENSG00000102078	0.00149701	0	0	0	0
ENSG00000102317	0	0	0.0174757	0	0.00202429
ENSG00000102978	0.0269461	0.00568182	0	0	0
ENSG00000103226	0.00449102	0.00852273	0.0038835	0.00595238	0.00202429
ENSG00000103495	0	0	0	0.00198413	0
ENSG00000103657	0	0	0	0.00198413	0
ENSG00000104341	0	0.0369318	0	0.0396825	0.0202429
ENSG00000104408	0.00898204	0	0	0	0
ENSG00000104413	0	0	0.00194175	0	0
ENSG00000104517	0.00149701	0	0.00194175	0	0
ENSG00000104613	0	0	0.00194175	0	0
ENSG00000105193	0.00149701	0	0	0	0
ENSG00000105835	0	0	0.00194175	0	0.00202429
ENSG00000106028	0.00149701	0	0	0	0
ENSG00000106636	0	0.00284091	0	0	0
ENSG00000107438	0	0	0	0.00396825	0.00607287
ENSG00000107779	0	0	0.0038835	0	0.00202429
ENSG00000108518	0.00149701	0	0	0	0
ENSG00000109270	0	0	0	0	0.00202429
ENSG00000110200	0	0	0.00194175	0	0
ENSG00000110700	0	0	0	0	0.00202429
ENSG00000111247	0	0	0	0.00198413	0
ENSG00000111300	0.00149701	0	0	0	0
ENSG00000111615	0	0.0198864	0.0213592	0	0
ENSG00000111640	0.00299401	0.119318	0.106796	0	0.1417
ENSG00000111669	0	0	0	0.00396825	0.00202429
ENSG00000111670	0.0164671	0.00284091	0	0	0
ENSG00000111752	0.00149701	0	0	0	0
ENSG00000112159	0.00149701	0	0	0	0
ENSG00000112200	0.00149701	0	0	0	0
ENSG00000112282	0	0	0	0.00198413	0
ENSG00000112379	0	0	0	0	0.00202429
ENSG00000112414	0.00149701	0	0	0.00198413	0
ENSG00000112706	0	0	0	0.00198413	0
ENSG00000112787	0.00299401	0.00852273	0	0.0138889	0
ENSG00000113013	0	0.00284091	0	0	0
ENSG00000113712	0.00149701	0	0	0	0.00202429
ENSG00000113721	0.00149701	0	0.00194175	0	0
ENSG00000114416	0	0	0.00970874	0	0
ENSG00000114857	0	0	0	0.00198413	0
ENSG00000114867	0	0	0	0	0.00202429
ENSG00000115464	0	0	0.00194175	0.00198413	0.00202429
ENSG00000115539	0.00449102	0.142045	0.0485437	0.0555556	0.034413
ENSG00000115541	0.00299401	0	0	0.00198413	0.00202429
ENSG00000115760	0	0	0	0	0.00202429
ENSG00000115839	0	0	0	0.00198413	0
ENSG00000116001	0	0.00284091	0	0	0
ENSG00000116251	0.00149701	0.00284091	0.0116505	0.00793651	0
ENSG00000116489	0.00149701	0	0	0	0.00404858
ENSG00000116497	0	0	0	0	0.00202429
ENSG00000116678	0	0	0	0.00198413	0
ENSG00000116748	0	0	0	0	0.00202429
ENSG00000116809	0	0	0	0	0.00202429
ENSG00000117245	0	0	0	0.00198413	0
ENSG00000117758	0.00149701	0	0	0	0
ENSG00000118113	0	0.00284091	0	0	0
ENSG00000118307	0	0	0	0	0.00202429
ENSG00000118454	0.00149701	0	0	0	0
ENSG00000118564	0.148204	0.00568182	0	0	0
ENSG00000118600	0.010479	0	0	0	0
ENSG00000118816	0.00149701	0	0	0	0
ENSG00000118965	0	0	0	0.00198413	0
ENSG00000118997	0	0	0.00194175	0	0
ENSG00000119335	0.00149701	0	0	0.00396825	0
ENSG00000119685	0	0	0	0.00198413	0
ENSG00000120137	0	0.00568182	0.00194175	0	0.00202429
ENSG00000120438	0.00898204	0	0	0	0
ENSG00000120658	0	0	0	0	0.00202429
ENSG00000121289	0.00149701	0	0	0	0
ENSG00000121570	0.00149701	0	0	0	0
ENSG00000121579	0.00748503	0	0	0	0
ENSG00000121671	0.00149701	0	0	0	0
ENSG00000121741	0	0	0.00194175	0	0
ENSG00000122008	0	0	0.00194175	0	0
ENSG00000122512	0	0	0	0.00198413	0
ENSG00000122565	0.679641	0.801136	0.881553	0.740079	0.712551
ENSG00000122643	0	0	0	0	0.00202429
ENSG00000122707	0.00149701	0	0	0	0
ENSG00000122966	0	0	0.00194175	0	0
ENSG00000123104	0.00299401	0	0.00194175	0	0
ENSG00000123505	0	0	0	0	0.00202429
ENSG00000123545	0	0.00284091	0	0	0
ENSG00000124562	0.0134731	0	0	0	0
ENSG00000124702	0.00149701	0	0	0	0
ENSG00000124721	0	0	0.00194175	0	0
ENSG00000124789	0	0	0.00194175	0	0
ENSG00000124920	0.00149701	0	0	0	0
ENSG00000125144	0	0.00284091	0	0	0
ENSG00000125445	0.00149701	0	0	0	0
ENSG00000125459	0.00149701	0	0	0	0
ENSG00000125952	0.00149701	0	0	0	0
ENSG00000126787	0	0	0.00194175	0	0
ENSG00000127184	0	0	0.00194175	0	0
ENSG00000127481	0.00149701	0	0.00194175	0.00198413	0.00202429
ENSG00000127980	0	0	0.00194175	0	0
ENSG00000128585	0	0	0.00194175	0	0
ENSG00000128641	0.00149701	0	0	0	0
ENSG00000128699	0	0	0.00194175	0	0
ENSG00000128731	0.00149701	0.00568182	0	0.00198413	0
ENSG00000129566	0.00149701	0	0	0	0
ENSG00000129675	0.00149701	0	0	0	0
ENSG00000130024	0	0.00284091	0	0.00198413	0
ENSG00000130158	0.00149701	0.00284091	0	0	0
ENSG00000130159	0	0.00284091	0	0	0
ENSG00000130255	0	0.00852273	0	0.0178571	0
ENSG00000131018	0	0	0	0.00198413	0.00202429
ENSG00000131732	0	0.00284091	0	0	0
ENSG00000132122	0.00149701	0	0	0	0
ENSG00000132522	0.00149701	0	0	0	0
ENSG00000132570	0	0	0	0.00198413	0
ENSG00000132603	0.00748503	0.00284091	0	0	0
ENSG00000132676	0.00149701	0	0	0	0
ENSG00000132692	0	0.00284091	0	0	0
ENSG00000132694	0	0	0	0	0.00202429
ENSG00000132819	0.00149701	0	0	0	0
ENSG00000133056	0	0	0	0	0.00202429
ENSG00000133112	0	0	0	0	0.00202429
ENSG00000133226	0.00449102	0.00568182	0.0038835	0.00992063	0.00607287
ENSG00000133818	0	0.00284091	0	0	0
ENSG00000133872	0	0.0142045	0	0.0456349	0.0202429
ENSG00000133962	0	0	0	0	0.00202429
ENSG00000134109	0.00149701	0	0	0	0
ENSG00000134222	0	0	0	0	0.0101215
ENSG00000134250	0	0.00284091	0.00194175	0	0
ENSG00000134287	0	0	0.00194175	0	0
ENSG00000134333	0	0	0	0	0.00202429
ENSG00000134453	0	0	0	0.00198413	0
ENSG00000134627	0.00149701	0	0	0	0
ENSG00000134970	0	0	0.00194175	0	0
ENSG00000135457	0	0.00284091	0	0	0
ENSG00000135596	0.00149701	0	0	0	0
ENSG00000135837	0	0	0	0	0.00202429
ENSG00000135976	0	0	0	0.00198413	0
ENSG00000136011	0.00149701	0	0	0	0
ENSG00000136068	0	0	0.00194175	0	0
ENSG00000136104	0.00149701	0	0	0	0
ENSG00000136144	0.00449102	0	0	0	0
ENSG00000136231	0.0299401	0.0198864	0.0601942	0.0297619	0.0303644
ENSG00000136810	0	0	0.00194175	0	0
ENSG00000136888	0	0	0	0.00198413	0
ENSG00000136895	0	0	0	0	0.00202429
ENSG00000137210	0.00149701	0.00284091	0.00194175	0	0
ENSG00000137312	0	0	0.00194175	0	0
ENSG00000137414	0.0224551	0.0909091	0.0485437	0.0575397	0.0404858
ENSG00000137492	0	0.00284091	0.00776699	0.00396825	0
ENSG00000137601	0	0.00284091	0	0	0
ENSG00000137700	0.00149701	0	0	0	0
ENSG00000137714	0	0	0	0	0.00202429
ENSG00000138448	0.00149701	0	0	0	0
ENSG00000138592	0.00299401	0.00284091	0	0.00198413	0.00202429
ENSG00000138688	0	0	0.00194175	0	0
ENSG00000138778	0.00149701	0	0	0	0
ENSG00000138792	0	0	0	0	0.00202429
ENSG00000139144	0	0	0	0	0.00202429
ENSG00000139218	0	0	0	0.00198413	0
ENSG00000139372	0.775449	0.681818	0.867961	0.694444	0.690283
ENSG00000139579	0	0	0.00194175	0	0
ENSG00000140157	0	0	0.00194175	0	0
ENSG00000140319	0	0	0.00194175	0	0
ENSG00000140853	0.00149701	0	0	0	0
ENSG00000140905	0.00149701	0	0	0	0
ENSG00000140992	0	0	0	0.00198413	0
ENSG00000141552	0	0	0.00194175	0	0
ENSG00000141568	0	0	0.0194175	0	0
ENSG00000141646	0	0	0	0.00396825	0
ENSG00000142609	0	0	0	0	0.00202429
ENSG00000143207	0	0	0	0.00198413	0
ENSG00000143252	0	0	0.00194175	0.00198413	0
ENSG00000143341	0	0.00284091	0	0	0
ENSG00000143436	0	0	0	0	0.00202429
ENSG00000143452	0.00149701	0	0	0	0
ENSG00000143494	0	0	0	0	0.00404858
ENSG00000143515	0	0	0	0	0.00202429
ENSG00000143543	0	0	0.00194175	0	0
ENSG00000143702	0	0	0	0.00198413	0
ENSG00000144381	0	0	0	0.00198413	0.00202429
ENSG00000144821	0	0	0	0.00198413	0.00202429
ENSG00000145147	0	0	0	0	0.00202429
ENSG00000145216	0	0	0	0	0.00202429
ENSG00000145592	0	0	0.00194175	0	0
ENSG00000145730	0	0.00284091	0	0	0
ENSG00000145741	0.00149701	0	0	0	0
ENSG00000145860	0.0224551	0.00568182	0.0427184	0.031746	0.034413
ENSG00000146350	0	0	0.00194175	0	0
ENSG00000146574	0	0	0.00194175	0	0
ENSG00000146776	0	0.00284091	0	0	0
ENSG00000147050	0	0	0	0.00198413	0
ENSG00000147065	0.00149701	0	0.00194175	0	0.00202429
ENSG00000147274	0.00449102	0	0	0.00198413	0
ENSG00000147403	0	0	0.00194175	0	0
ENSG00000147679	0	0	0.00194175	0	0
ENSG00000148356	0.00149701	0	0	0	0
ENSG00000148408	0.0179641	0.0198864	0.0174757	0.0337302	0.0182186
ENSG00000149100	0.0179641	0	0	0	0
ENSG00000149273	0	0	0.0038835	0	0
ENSG00000149311	0	0	0	0.00198413	0
ENSG00000149357	0	0	0	0.00198413	0.0182186
ENSG00000149531	0.0224551	0.0170455	0.00194175	0.0436508	0.101215
ENSG00000149547	0.00149701	0	0	0	0
ENSG00000150093	0	0.00284091	0	0	0.00202429
ENSG00000150459	0	0	0	0.00198413	0
ENSG00000150527	0.00149701	0	0	0	0
ENSG00000150760	0	0	0	0	0.00202429
ENSG00000150787	0.00149701	0	0	0	0
ENSG00000151067	0	0	0.00194175	0	0
ENSG00000151422	0.00149701	0	0	0	0
ENSG00000151779	0.00149701	0	0	0	0
ENSG00000151914	0	0	0.00194175	0	0.00202429
ENSG00000152208	0	0	0	0	0.00202429
ENSG00000152348	0	0	0	0.00198413	0
ENSG00000152484	0	0	0.00194175	0	0
ENSG00000152558	0	0	0	0.00198413	0
ENSG00000152601	0.00149701	0	0	0	0
ENSG00000152818	0	0	0.00194175	0	0
ENSG00000153107	0.00149701	0	0	0.00198413	0.00202429
ENSG00000153201	0	0	0	0.00198413	0
ENSG00000153207	0.00299401	0	0.00194175	0	0
ENSG00000153391	0	0	0.0038835	0	0
ENSG00000153956	0	0.00284091	0	0	0
ENSG00000154059	0	0	0	0.00198413	0
ENSG00000154263	0.00299401	0	0	0	0
ENSG00000154265	0.00149701	0	0	0	0
ENSG00000154447	0	0	0	0.00198413	0
ENSG00000155313	0	0.00284091	0	0	0
ENSG00000155438	0.00748503	0	0	0	0
ENSG00000155561	0	0	0	0.00198413	0
ENSG00000155657	0.00598802	0.00568182	0.00194175	0.00396825	0.00404858
ENSG00000155744	0	0	0	0	0.00404858
ENSG00000156374	0	0	0.00194175	0	0
ENSG00000156467	0	0.00568182	0	0	0
ENSG00000156795	0	0	0	0.00396825	0
ENSG00000156802	0	0	0	0.00198413	0
ENSG00000157106	0.00149701	0	0.00194175	0	0
ENSG00000157350	0	0	0	0.00198413	0
ENSG00000157388	0	0	0	0.00198413	0
ENSG00000157423	0.00149701	0	0	0	0.00404858
ENSG00000157483	0	0	0	0	0.00202429
ENSG00000157856	0	0	0	0	0.00202429
ENSG00000158321	0	0	0.00194175	0	0
ENSG00000160075	0	0	0.00194175	0	0
ENSG00000160188	0.00149701	0	0	0	0
ENSG00000160211	0.00149701	0	0	0	0
ENSG00000160877	0	0	0.00776699	0	0
ENSG00000161203	0	0	0	0	0.00202429
ENSG00000162869	0.00149701	0	0	0	0
ENSG00000162927	0	0	0	0.00198413	0
ENSG00000163029	0	0	0	0	0.00202429
ENSG00000163312	0	0	0	0	0.00202429
ENSG00000163319	0	0	0	0	0.00607287
ENSG00000163389	0	0	0	0	0.00202429
ENSG00000163467	0.00748503	0	0	0	0
ENSG00000163492	0	0.00284091	0	0	0
ENSG00000163510	0	0	0.00194175	0	0
ENSG00000163539	0	0	0.00194175	0	0
ENSG00000163554	0	0	0.00194175	0	0
ENSG00000163605	0	0	0.00194175	0	0
ENSG00000163638	0	0	0	0	0.00202429
ENSG00000163754	0	0	0.00194175	0	0
ENSG00000163877	0	0.00284091	0	0	0
ENSG00000164032	0	0.00284091	0	0	0
ENSG00000164118	0	0	0.00194175	0	0
ENSG00000164190	0.00149701	0	0	0	0
ENSG00000164253	0	0.00284091	0	0	0
ENSG00000164796	0.00149701	0	0	0	0.00202429
ENSG00000165084	0	0	0	0.00198413	0
ENSG00000165181	0	0	0	0.00198413	0
ENSG00000165390	0.00149701	0	0	0	0
ENSG00000165480	0.0688623	0.28125	0.493204	0.285714	0.435223
ENSG00000165521	0	0	0	0	0.00202429
ENSG00000165732	0	0	0.00194175	0	0
ENSG00000165898	0	0.00284091	0	0	0
ENSG00000165899	0	0	0	0.00198413	0
ENSG00000165912	0.00149701	0	0	0	0
ENSG00000165995	0	0	0	0	0.00202429
ENSG00000166377	0.0748503	0.0113636	0	0	0
ENSG00000166454	0.00449102	0	0	0	0
ENSG00000166743	0	0	0	0	0.00202429
ENSG00000166747	0	0	0	0.00198413	0
ENSG00000167004	0	0	0.0038835	0	0
ENSG00000167460	0	0	0.00194175	0	0
ENSG00000167548	0.00149701	0	0	0	0
ENSG00000167721	0	0	0.00194175	0	0
ENSG00000168028	0	0	0	0.00198413	0
ENSG00000168214	0.00898204	0.0170455	0.023301	0.0198413	0.0182186
ENSG00000168614	0.00449102	0.00852273	0.0038835	0.00396825	0
ENSG00000168702	0	0	0	0.00198413	0.00202429
ENSG00000168778	0.00149701	0	0	0	0
ENSG00000168958	0.438623	0.119318	0.0407767	0.119048	0.208502
ENSG00000169062	0	0	0	0	0.00607287
ENSG00000169139	0	0.00284091	0	0	0
ENSG00000169246	0.00149701	0.00568182	0.0038835	0.00396825	0.00809717
ENSG00000169499	0	0	0	0.00198413	0
ENSG00000170074	0.00149701	0.00284091	0	0.00198413	0.00202429
ENSG00000170144	0	0	0.0038835	0	0
ENSG00000170160	0	0	0.00194175	0	0
ENSG00000170242	0	0	0	0.00198413	0
ENSG00000170906	0	0.00284091	0	0	0
ENSG00000171055	0.00449102	0	0	0	0
ENSG00000171132	0.00149701	0	0	0	0
ENSG00000171204	0.11976	0.0198864	0.00194175	0	0
ENSG00000171314	0	0	0	0.00198413	0
ENSG00000171502	0	0	0	0	0.00202429
ENSG00000172115	0.00149701	0	0	0	0
ENSG00000173674	0.00449102	0.00284091	0	0	0
ENSG00000173812	0	0	0	0	0.00202429
ENSG00000173915	0.00449102	0	0	0	0
ENSG00000174093	0	0	0	0	0.00202429
ENSG00000174373	0.00299401	0.00284091	0	0.00198413	0.00202429
ENSG00000174469	0	0	0.00194175	0	0
ENSG00000174799	0	0	0	0.00198413	0
ENSG00000174827	0	0	0	0	0.00202429
ENSG00000175387	0	0	0.00194175	0	0
ENSG00000175582	0.00149701	0	0	0	0
ENSG00000176783	0.00149701	0	0	0	0
ENSG00000176853	0	0	0	0.00198413	0.00202429
ENSG00000176915	0	0	0	0	0.00607287
ENSG00000177156	0.00149701	0	0	0	0
ENSG00000177200	0	0.00284091	0	0.00198413	0
ENSG00000177600	0	0	0	0.00198413	0
ENSG00000177879	0.974551	0.917614	0.953398	0.972222	0.949393
ENSG00000178104	0.00299401	0	0	0	0
ENSG00000178127	0.00149701	0	0	0	0.00404858
ENSG00000180228	0.282934	0.625	0.537864	0.501984	0.520243
ENSG00000180370	0.0134731	0.03125	0.0194175	0.0218254	0.0222672
ENSG00000180694	0	0	0.00194175	0	0
ENSG00000180777	0	0	0	0.00198413	0
ENSG00000181163	0	0	0	0	0.00202429
ENSG00000181929	0	0	0	0	0.00202429
ENSG00000182095	0.00149701	0	0	0	0
ENSG00000182621	0.00149701	0	0	0	0
ENSG00000182899	0	0	0	0	0.00404858
ENSG00000183091	0	0	0	0.00198413	0
ENSG00000183354	0	0	0	0.00198413	0
ENSG00000183765	0.00149701	0	0	0	0
ENSG00000183914	0	0	0	0	0.00202429
ENSG00000184445	0	0	0	0	0.00202429
ENSG00000185088	0	0	0	0	0.00202429
ENSG00000185261	0	0.00284091	0	0	0
ENSG00000185305	0	0.00284091	0	0	0
ENSG00000185716	0.0913174	0.0511364	0.0116505	0.00992063	0.176113
ENSG00000185842	0	0.00284091	0	0	0
ENSG00000185864	0.00898204	0.0113636	0.00776699	0.00992063	0.00202429
ENSG00000186275	0.00299401	0	0	0.00198413	0
ENSG00000186298	0	0	0	0.00595238	0
ENSG00000186439	0.00149701	0	0	0	0
ENSG00000186998	0	0	0	0.00198413	0
ENSG00000187240	0.00149701	0	0	0	0
ENSG00000187323	0	0	0	0	0.00202429
ENSG00000187522	0.00149701	0	0	0	0
ENSG00000187742	0.00449102	0	0	0	0
ENSG00000188219	0	0	0.00194175	0	0
ENSG00000188641	0	0	0	0	0.00202429
ENSG00000188647	0	0.00284091	0	0	0
ENSG00000188906	0	0	0.00194175	0	0
ENSG00000196367	0.00149701	0	0	0.00198413	0
ENSG00000196419	0	0	0.0038835	0	0
ENSG00000196586	0	0	0	0	0.00202429
ENSG00000196712	0	0	0	0	0.00202429
ENSG00000197006	0	0	0	0.00198413	0
ENSG00000197020	0	0	0	0.00793651	0.00202429
ENSG00000197121	0.00149701	0	0	0	0
ENSG00000197136	0	0	0	0	0.00202429
ENSG00000197386	0.00149701	0	0	0	0
ENSG00000197563	0	0	0.00194175	0	0
ENSG00000197728	0	0	0	0.00198413	0
ENSG00000197756	0	0	0.0466019	0	0.00202429
ENSG00000197893	0.00149701	0	0	0	0
ENSG00000197930	0	0.00284091	0	0	0
ENSG00000197958	0	0	0.00194175	0.00198413	0
ENSG00000197969	0.00149701	0	0	0	0
ENSG00000198355	0.00149701	0	0	0	0
ENSG00000198382	0.00149701	0	0	0	0
ENSG00000198399	0	0	0	0.00198413	0
ENSG00000198420	0	0	0	0	0.00202429
ENSG00000198554	0	0.00284091	0	0	0
ENSG00000198586	0	0	0	0	0.00202429
ENSG00000198626	0	0	0	0.00198413	0
ENSG00000198648	0	0	0	0	0.00202429
ENSG00000198848	0	0	0	0	0.00202429
ENSG00000198947	0	0	0	0	0.00404858
ENSG00000203667	0.00149701	0	0.00582524	0	0
ENSG00000203943	0	0.00284091	0	0	0
ENSG00000204262	0	0.00284091	0	0	0
ENSG00000204304	0.00149701	0	0	0.00198413	0
ENSG00000204308	0.00299401	0	0	0	0
ENSG00000204628	0	0	0	0	0.00404858
ENSG00000204790	0	0	0.0038835	0	0
ENSG00000205038	0.00149701	0	0	0	0
ENSG00000205339	0.00149701	0	0.00582524	0	0.00202429
ENSG00000205358	0.0224551	0	0	0	0.00202429
ENSG00000205359	0	0	0.00194175	0	0
ENSG00000205726	0	0	0.00194175	0	0
ENSG00000211460	0.00149701	0	0	0	0
ENSG00000213064	0.00449102	0	0	0	0
ENSG00000213585	0	0	0	0	0.00202429
ENSG00000213741	0	0	0	0	0.00202429
ENSG00000213759	0	0	0	0	0.00202429
ENSG00000213995	0	0	0.00194175	0	0
ENSG00000227345	0.00149701	0	0	0	0
ENSG00000241186	0.00149701	0	0	0	0
ENSG00000241973	0	0	0	0	0.00202429
ENSG00000243414	0	0	0.00194175	0	0
ENSG00000243678	0	0	0	0	0.00202429
ENSG00000243716	0	0	0	0	0.00202429
ENSG00000251201	0	0	0.00194175	0	0
ENSG00000253729	0.00149701	0	0	0	0
ENSG00000254685	0	0	0	0	0.00202429
ENSG00000254999	0.00149701	0	0	0	0
ENSG00000257103	0	0	0	0.00198413	0
ENSG00000258941	0.00149701	0	0	0	0
ENSG00000261915	0.00149701	0	0	0	0
ENSG00000264364	0	0	0	0.00198413	0
ENSG00000264424	0.00149701	0	0	0	0
ENSG00000267699	0	0	0	0.00396825	0
ENSG00000272822	0	0	0.00194175	0	0
